# Supplementary material
Source: Royal Society of Chemistry journal article supplement (doi:10.1039/d6nj01380e)
Supplement: d6nj01380e1.pdf [file d6nj01380e1.pdf]

## Supplementary Information

# Examining Factors Affecting the Schiff base Post-synthetic Modification of UiO-66-NH<sub>2</sub> Films by Reactive Inkjet Printing

Fatimah Al-Ghazzawi,<sup>a,b</sup> Luke Conte,<sup>c</sup> Pawel Wagner\*<sup>a</sup> and Christopher Richardson\*<sup>c</sup>

<sup>a</sup> Intelligent Polymer Research Institute, AIIIM Faculty, Innovation Campus, University of Wollongong, North Wollongong, NSW 2522, Australia.

<sup>b</sup> Al-Nasiriyah Technical Institute, Southern Technical University, 64001, Thi-Qar, Iraq.

<sup>c</sup> School of Science, Faculty of Science Medicine and Health, University of Wollongong, NSW 2522, Australia.

## Table of Contents

|      |                                                                                     |    |
|------|-------------------------------------------------------------------------------------|----|
| 1    | General experimental .....                                                          | 3  |
| 2    | List of Experiments.....                                                            | 4  |
| 3    | Ink surface tensions and contact angles .....                                       | 5  |
| 4    | Optical and SEM-EDS imaging and scans of films .....                                | 6  |
| 4.1  | UiO-66-NH <sub>2</sub> .....                                                        | 8  |
| 4.2  | Exp. 1: 1-Butanol ink printed (100 reps) and matured for 6 days at 25 °C.....       | 9  |
| 4.3  | Exp 2: Dioxane ink printed (100 reps) and matured for 0 days at 25 °C. ....         | 10 |
| 4.4  | Exp. 3: Dioxane ink printed (100 reps) and matured for 1 day at 25 °C.....          | 11 |
| 4.5  | Exp. 4: Dioxane ink printed (100 reps) and matured for 2 days at 25 °C. ....        | 12 |
| 4.6  | Exp. 5: Dioxane ink printed (100 reps) and matured for 4 days at 25 °C. ....        | 13 |
| 4.7  | Exp. 6: Dioxane ink printed (100 reps) and matured for 6 days at 25 °C. ....        | 14 |
| 4.8  | Exp. 7: Dioxane ink printed (50 reps) and matured for 2 days at 25 °C. ....         | 15 |
| 4.9  | Exp. 8: Dioxane ink printed (200 reps) and matured for 2 days at 25 °C. ....        | 16 |
| 4.10 | Exp. 9: Dioxane ink printed (100 reps) and matured for 0 days at 40 °C. ....        | 17 |
| 4.11 | Exp. 10: Dioxane ink printed (100 reps) and matured for 1 days at 40 °C. ....       | 18 |
| 4.12 | Exp. 11: Dioxane ink printed (100 reps) and matured for 2 days at 40 °C. ....       | 19 |
| 4.13 | Exp. 12: Dioxane ink printed (100 reps) and matured for 0 days at 70 °C. ....       | 20 |
| 4.14 | Exp. 13: Dioxane ink printed (100 reps) and matured for 1 days at 70 °C. ....       | 21 |
| 4.15 | Exp. 14: Dioxane ink printed (100 reps) and matured for 2 days at 70 °C. ....       | 22 |
| 5    | Top-down optical images of films printed and matured at different temperatures..... | 23 |
| 6    | SEM-EDS analyses of film cross sections.....                                        | 26 |
| 6.1  | Dioxane printed (100 reps) and matured for 0 days at 25 °C.....                     | 26 |
| 6.2  | Dioxane printed (100 reps) and matured for 2 days at 25 °C.....                     | 27 |
| 6.3  | Dioxane printed (100 reps) and matured for 0 days at 70 °C.....                     | 28 |

|     |                                                                 |    |
|-----|-----------------------------------------------------------------|----|
| 6.4 | Dioxane printed (100 reps) and matured for 2 days at 70 °C..... | 29 |
| 7   | Gas adsorption .....                                            | 30 |

## 1 General experimental

All chemicals used were of analytical grade and purchased from either Sigma Aldrich, VWR Australia or Ajax Finechem Pty Ltd. Films of UiO-66-NH<sub>2</sub> were prepared following the method described by Li et al.<sup>1</sup>

Inkjet printing was performed exactly as per our previous description.<sup>2</sup> Briefly, a computer controlled PixDro LP50 piezo-controlled drop-on-demand printer assembled with single 128 nozzle printhead (Type SE 128 AA; nozzle spacing of 502 microns; nozzle diameter 35 microns) with ink bottle connected to the pressure tube and voltage cable was used. The pressure and voltage of jetting were 18-21 mbar and 58-60 V, respectively. After every 10 layers, the active nozzle was checked for blockage.

Leica M205A and Leica DM6000 microscopes fitted with CCD cameras were used to obtain images of the morphology of the samples and resolution of the patterns. The Leica M205A was used at scales from 10 mm to 1 mm and the Leica DM6000 at scales from 500 μm to 25 μm.

A JEOL JSM-7500 was used to study morphologies of all the samples at 15 kV. Energy-Dispersive X-Ray Spectroscopy (EDS) data was recorded on a JEOL JSM-6490LV at 15 kV accelerating voltage. Samples were prepared by attaching the printed material onto a copper heel by a conductive carbon tape and silver paint. Samples for imaging were coated by thin platinum layer. Samples for EDS analysis were not coated.

TG-DSC traces were obtained using a NETZSCH STA 449 F3 Jupiter simultaneous thermogravimetric and differential scanning calorimeter. Data was processed using NETZSCH Proteus Thermal Analyser software, version 6.1.0. Traces were recorded by placing the sample (~5-10 mg) in a Pt pan and subjecting the material to the specified heating protocols reported. This was usually 35-1000 °C at 10 °C/min under a flow of O<sub>2</sub>/N<sub>2</sub> (20:80) of 20 cm<sup>3</sup>/min.

Powder X-ray diffraction (PXRD) patterns were recorded on a GBC-MMA X-ray diffractometer with samples mounted on the borosilicate glass substrate 2θ angle range of 5°-45° in 2θ with a step size of 0.05° at 1° per minute.

Gas adsorption studies were carried out at the Wollongong Isotope and Geochronology Laboratory using a Quantachrome Autosorb MP instrument and high purity nitrogen (99.999%) gas. Surface areas were determined using Brunauer-Emmett-Teller (BET) calculations.

---

<sup>1</sup> J. Li, F. Wu, L. Lin, Y. Guo, H. Liu and X. Zhang, *Chem. Eng. J.*, 2018, **333**, 146.

<sup>2</sup> F. Al-Ghazzawi, L. Conte, K. K. Wagner, C. Richardson and P. Wagner *Chem. Commun.*, 2021, **57**, 4706

## 2 List of Experiments

| Exp. | Solvent     | Repetitions | Temp. (°C) | Time (d) | S (Wt%) | s.d. |
|------|-------------|-------------|------------|----------|---------|------|
| 1    | 1-butanol   | 100         | 25         | 6        | 1.79    | 0.17 |
| 2    | 1,4-dioxane | 100         | 25         | 0        | 0.86    | 0.10 |
| 3    | 1,4-dioxane | 100         | 25         | 1        | 1.27    | 0.15 |
| 4    | 1,4-dioxane | 100         | 25         | 2        | 2.13    | 0.35 |
| 5    | 1,4-dioxane | 100         | 25         | 4        | 2.19    | 0.15 |
| 6    | 1,4-dioxane | 100         | 25         | 6        | 2.74    | 0.24 |
| 7    | 1,4-dioxane | 50          | 25         | 2        | 0.98    | 0.09 |
| 8    | 1,4-dioxane | 200         | 25         | 2        | 3.17    | 0.24 |
| 9    | 1,4-dioxane | 100         | 40         | 0        | 0.95    | 0.03 |
| 10   | 1,4-dioxane | 100         | 40         | 1        | 1.42    | 0.10 |
| 11   | 1,4-dioxane | 100         | 40         | 2        | 2.45    | 0.07 |
| 12   | 1,4-dioxane | 100         | 70         | 0        | 1.34    | 0.08 |
| 13   | 1,4-dioxane | 100         | 70         | 1        | 2.08    | 0.07 |
| 14   | 1,4-dioxane | 100         | 70         | 2        | 3.19    | 0.15 |

### 3 Ink surface tensions and contact angles

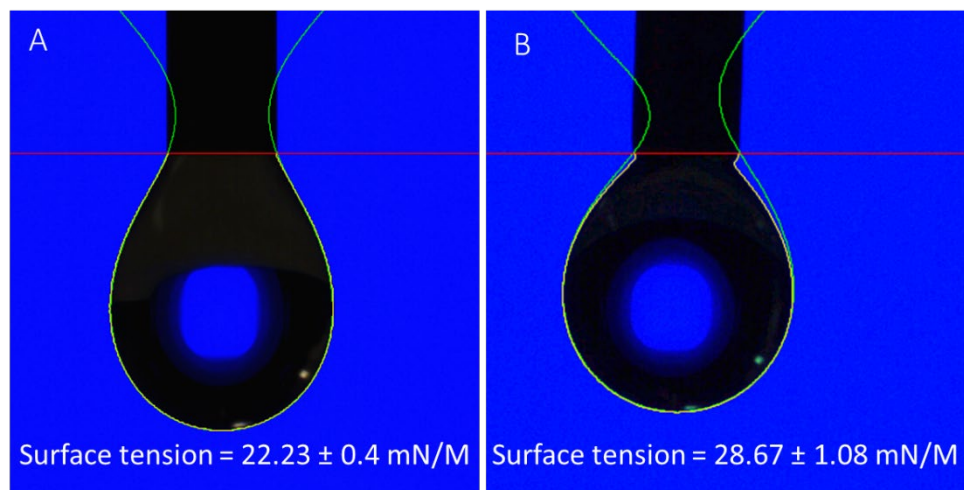

**Figure S 1** Surface tensions of 0.1 M Th-CHO inks in (A) 1-butanol and (B) 1,4-dioxane.

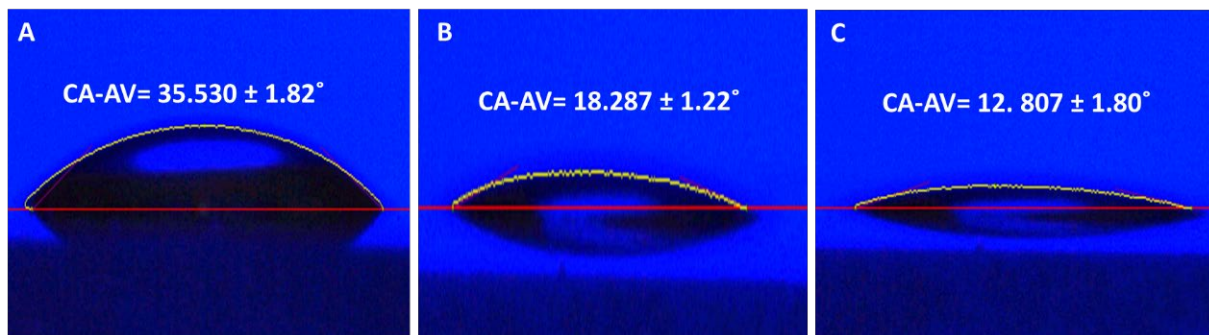

**Figure S 2** Contact angles of (A) H<sub>2</sub>O, (B) 0.1 M Ch-CHO in 1-butanol ink, and (C) 0.1 M Th-CHO in 1,4-dioxane ink on UiO-66-NH<sub>2</sub> films.

#### 4 Optical and SEM-EDS imaging and scans of films

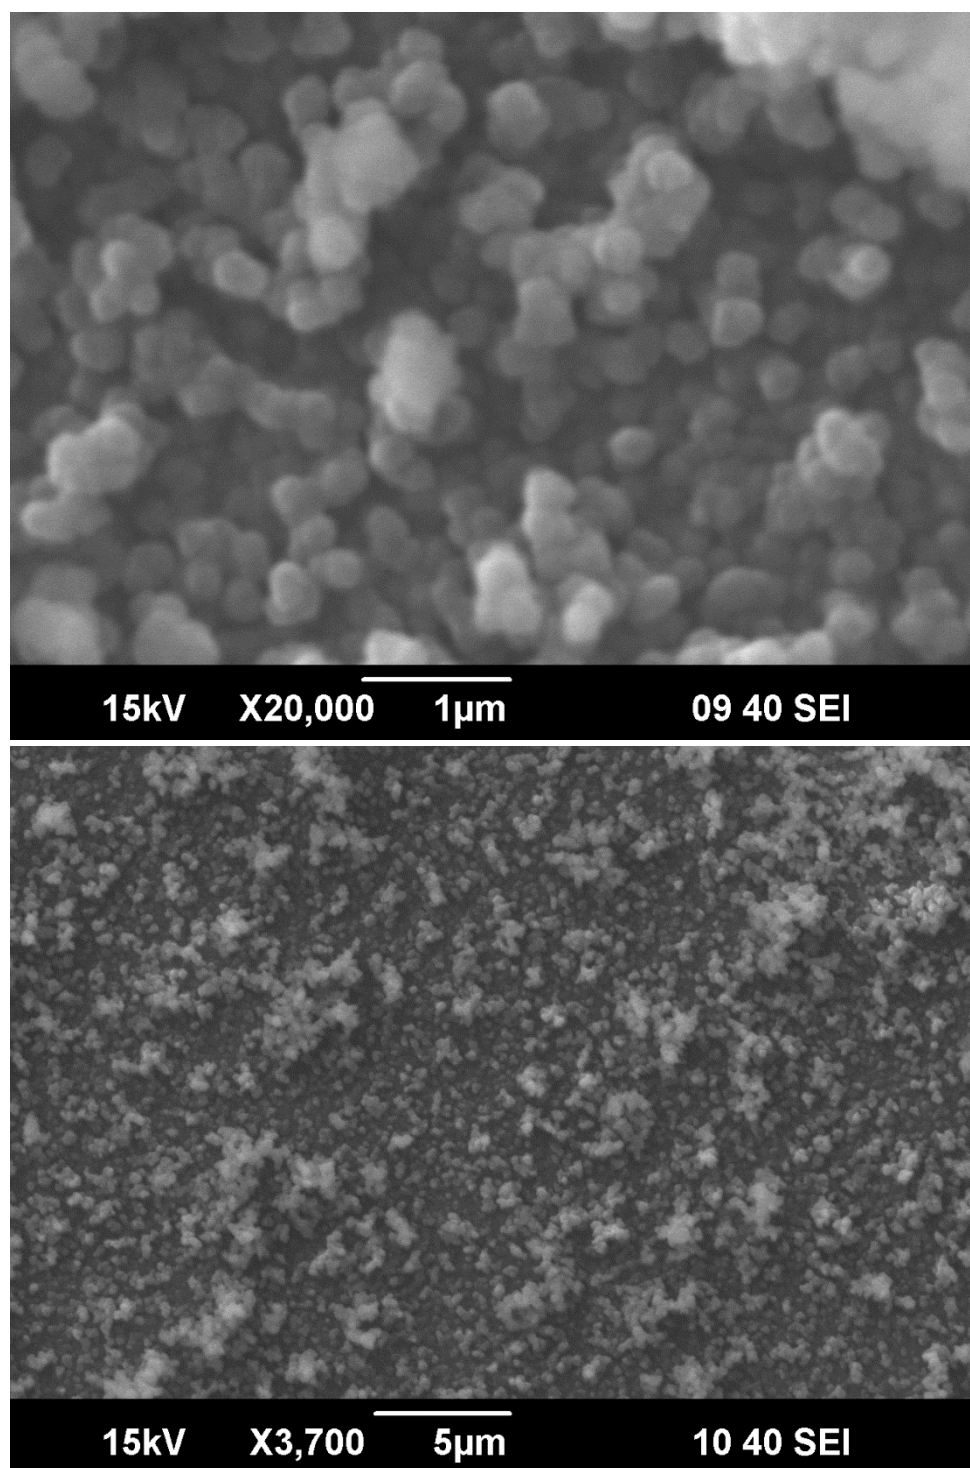

Figure S 3 SEM imaging of a representative UiO-66-NH<sub>2</sub> film.

### Electron Image 10

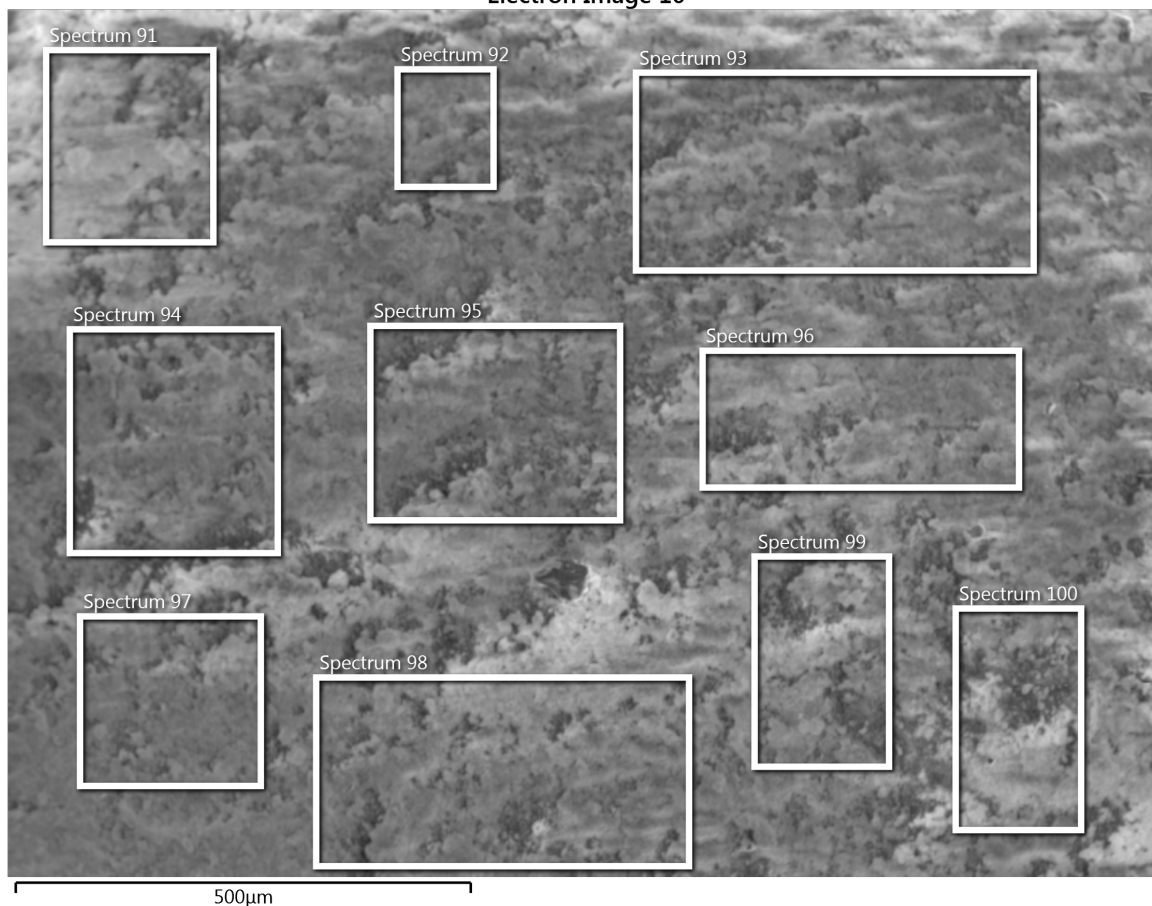

**Figure S 4** This scan analysed all the elements in a UiO-66-NH<sub>2</sub> film. The signals of glass were removed from all other spectra.

**Table S 1** Elemental analyses obtained from SEM-EDS scans of a representative film of UiO-66-NH<sub>2</sub>.

| Spectrum Label | Spectrum 100 | Spectrum 91 | Spectrum 92 | Spectrum 93 | Spectrum 94 | Spectrum 95 | Spectrum 96 | Spectrum 97 | Spectrum 98 | Spectrum 99 |
|----------------|--------------|-------------|-------------|-------------|-------------|-------------|-------------|-------------|-------------|-------------|
| C              | 39.33        | 41.96       | 40.05       | 42.29       | 37.11       | 37.70       | 39.08       | 40.51       | 42.08       | 40.64       |
| O              | 28.80        | 28.15       | 28.49       | 27.81       | 29.76       | 29.79       | 29.20       | 28.37       | 28.15       | 28.78       |
| Na             | 2.77         | 1.87        | 1.45        | 1.80        | 2.39        | 2.36        | 1.87        | 2.43        | 1.96        | 2.52        |
| Mg             | 0.82         | 0.51        | 0.47        | 0.53        | 0.68        | 0.69        | 0.54        | 0.72        | 0.57        | 0.76        |
| Al             | 0.28         | 0.20        | 0.17        |             | 0.24        | 0.23        | 0.19        |             | 0.20        | 0.19        |
| Si             | 12.39        | 8.97        | 7.79        | 8.94        | 10.88       | 10.67       | 9.03        | 11.31       | 9.37        | 11.56       |
| K              | 0.13         | 0.10        |             | 0.08        |             |             |             | 0.11        | 0.10        | 0.11        |
| Ca             | 1.94         | 1.37        | 1.32        | 1.35        | 1.76        | 1.66        | 1.38        | 1.84        | 1.47        | 1.77        |
| Br             |              |             |             | 0.45        |             |             |             | 0.45        |             |             |
| Zr             | 13.53        | 16.88       | 20.24       | 16.75       | 17.19       | 16.91       | 18.71       | 14.26       | 16.11       | 13.67       |
| Total          | 100.00       | 100.00      | 100.00      | 100.00      | 100.00      | 100.00      | 100.00      | 100.00      | 100.00      | 100.00      |

| Statistics         | C     | O     | Na   | Mg   | Al   | Si    | K    | Ca   | Br   | Zr    |
|--------------------|-------|-------|------|------|------|-------|------|------|------|-------|
| Max                | 42.29 | 29.79 | 2.77 | 0.82 | 0.28 | 12.39 | 0.13 | 1.94 | 0.45 | 20.24 |
| Min                | 37.11 | 27.81 | 1.45 | 0.47 | 0.17 | 7.79  | 0.08 | 1.32 | 0.45 | 13.53 |
| Average            | 40.07 | 28.73 | 2.14 | 0.63 |      | 10.09 |      | 1.59 |      | 16.43 |
| Standard Deviation | 1.79  | 0.68  | 0.41 | 0.12 |      | 1.47  |      | 0.23 |      | 2.15  |

## 4.1 UiO-66-NH<sub>2</sub>

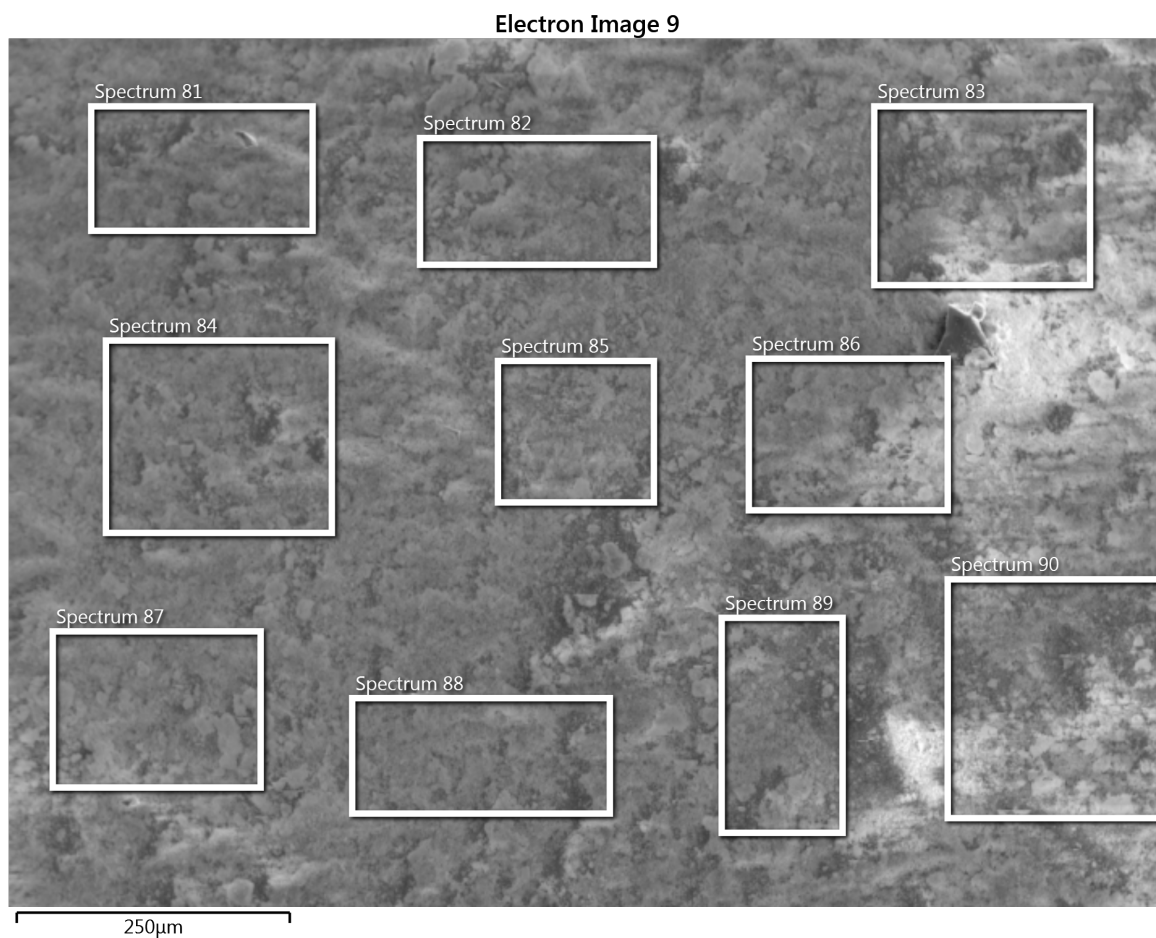

**Figure S 5** This scan is UiO-66-NH<sub>2</sub> film with elements of glass removed from the analysis.

**Table S 2** Elemental analyses obtained from SEM-EDS scans of a representative film of UiO-66-NH<sub>2</sub>.

| Spectrum Label | Spectrum 90 | Spectrum 81 | Spectrum 82 | Spectrum 83 | Spectrum 84 | Spectrum 85 | Spectrum 86 | Spectrum 87 | Spectrum 88 | Spectrum 89 |
|----------------|-------------|-------------|-------------|-------------|-------------|-------------|-------------|-------------|-------------|-------------|
| C              | 37.69       | 39.34       | 40.08       | 37.30       | 39.42       | 38.64       | 40.51       | 39.53       | 39.07       | 38.82       |
| O              | 40.29       | 36.59       | 34.71       | 40.25       | 36.43       | 37.83       | 33.76       | 36.24       | 37.02       | 37.75       |
| Zr             | 22.02       | 24.07       | 25.21       | 22.46       | 24.15       | 23.54       | 25.73       | 24.23       | 23.92       | 23.43       |
| Total          | 100.00      | 100.00      | 100.00      | 100.00      | 100.00      | 100.00      | 100.00      | 100.00      | 100.00      | 100.00      |

| Statistics         | C     | O     | Zr    |
|--------------------|-------|-------|-------|
| Max                | 40.51 | 40.29 | 25.73 |
| Min                | 37.30 | 33.76 | 22.02 |
| Average            | 39.04 | 37.09 | 23.87 |
| Standard Deviation | 0.99  | 2.09  | 1.12  |

4.2 Exp. 1: 1-Butanol ink printed (100 reps) and matured for 6 days at 25 °C.

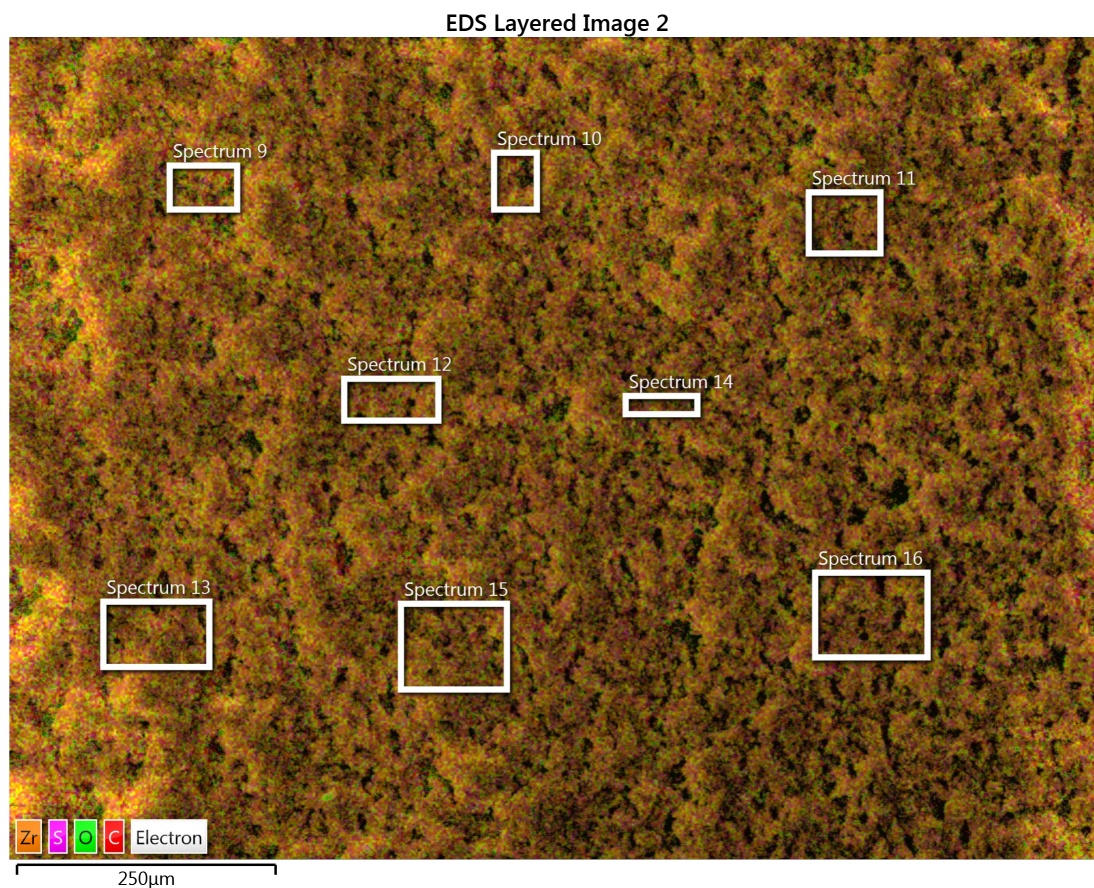

Figure S 6

Table S 3 Elemental EDS vales for the sections examined in the film shown in Figure S6.

| Spectrum Label | Spectrum 9 | Spectrum 10 | Spectrum 11 | Spectrum 12 | Spectrum 13 | Spectrum 14 | Spectrum 15 | Spectrum 16 |
|----------------|------------|-------------|-------------|-------------|-------------|-------------|-------------|-------------|
| C              | 43.99      | 43.76       | 44.38       | 44.10       | 44.19       | 43.49       | 44.02       | 44.25       |
| O              | 30.20      | 28.97       | 28.35       | 28.90       | 27.89       | 26.63       | 29.39       | 28.64       |
| S              | 1.49       | 1.89        | 1.95        | 1.69        | 1.73        | 2.02        | 1.72        | 1.82        |
| Zr             | 24.32      | 25.38       | 25.33       | 25.31       | 26.19       | 27.85       | 24.87       | 25.28       |
| Total          | 100.00     | 100.00      | 100.00      | 100.00      | 100.00      | 100.00      | 100.00      | 100.00      |

| Statistics         | C     | O     | S    | Zr    |
|--------------------|-------|-------|------|-------|
| Max                | 44.38 | 30.20 | 2.02 | 27.85 |
| Min                | 43.49 | 26.63 | 1.49 | 24.32 |
| Average            | 44.02 | 28.62 | 1.79 | 25.57 |
| Standard Deviation | 0.28  | 1.06  | 0.17 | 1.06  |

### 4.3 Exp 2: Dioxane ink printed (100 reps) and matured for 0 days at 25 °C.

No image is provided due to corruption of the image file. This does not impact the data which were acquired in the measurement zones that is provided in the table below.

**Table S 4** Elemental EDS vales for the sections examined in the film.

| Spectrum Label | Spectrum 24 | Spectrum 25 | Spectrum 26 | Spectrum 27 | Spectrum 28 | Spectrum 29 | Spectrum 30 | Spectrum 31 |
|----------------|-------------|-------------|-------------|-------------|-------------|-------------|-------------|-------------|
| C              | 42.91       | 43.48       | 42.60       | 44.45       | 42.55       | 43.02       | 44.11       | 44.55       |
| O              | 39.44       | 36.93       | 39.18       | 33.20       | 38.99       | 38.59       | 29.29       | 33.87       |
| S              | 0.82        | 0.80        | 0.76        | 1.04        | 0.83        | 0.77        | 0.99        | 0.85        |
| Zr             | 16.83       | 18.78       | 17.46       | 21.31       | 17.63       | 17.63       | 25.61       | 20.73       |
| Total          | 100.00      | 100.00      | 100.00      | 100.00      | 100.00      | 100.00      | 100.00      | 100.00      |

| Statistics         | C     | O     | S    | Zr    |
|--------------------|-------|-------|------|-------|
| Max                | 44.55 | 39.44 | 1.04 | 25.61 |
| Min                | 42.55 | 29.29 | 0.76 | 16.83 |
| Average            | 43.46 | 36.19 | 0.86 | 19.50 |
| Standard Deviation | 0.82  | 3.70  | 0.10 | 2.95  |

#### 4.4 Exp. 3: Dioxane ink printed (100 reps) and matured for 1 day at 25 °C.

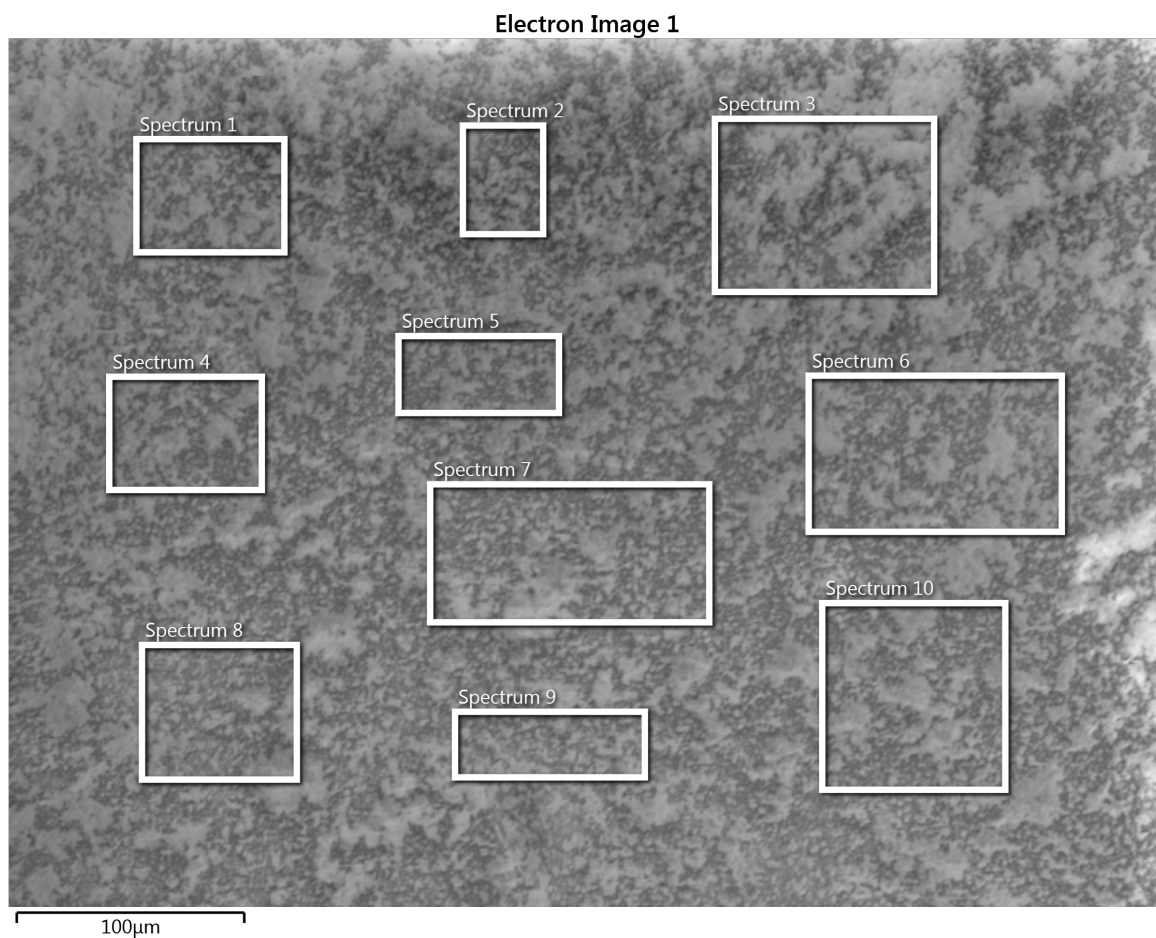

**Figure S 7**

**Table S 5** Elemental EDS vales for the sections examined in the film in Figure S 7.

| Spectrum Label | Spectrum 1 | Spectrum 2 | Spectrum 3 | Spectrum 4 | Spectrum 5 | Spectrum 6 | Spectrum 7 | Spectrum 8 | Spectrum 9 | Spectrum 10 |
|----------------|------------|------------|------------|------------|------------|------------|------------|------------|------------|-------------|
| C              | 48.36      | 45.26      | 46.37      | 48.76      | 48.80      | 47.00      | 48.29      | 48.93      | 48.87      | 48.38       |
| O              | 35.95      | 38.12      | 34.11      | 35.70      | 36.47      | 36.58      | 36.56      | 35.99      | 35.50      | 35.26       |
| S              | 1.29       | 1.53       | 1.50       | 1.30       | 1.28       | 1.18       | 1.13       | 1.27       | 1.14       | 1.09        |
| Zr             | 14.40      | 15.09      | 18.03      | 14.24      | 13.45      | 15.23      | 14.02      | 13.81      | 14.49      | 15.27       |
| Total          | 100.00     | 100.00     | 100.00     | 100.00     | 100.00     | 100.00     | 100.00     | 100.00     | 100.00     | 100.00      |

| Statistics         | C     | O     | S    | Zr    |
|--------------------|-------|-------|------|-------|
| Max                | 48.93 | 38.12 | 1.53 | 18.03 |
| Min                | 45.26 | 34.11 | 1.09 | 13.45 |
| Average            | 47.90 | 36.02 | 1.27 | 14.80 |
| Standard Deviation | 1.26  | 1.05  | 0.15 | 1.29  |

4.5 Exp. 4: Dioxane ink printed (100 reps) and matured for 2 days at 25 °C.

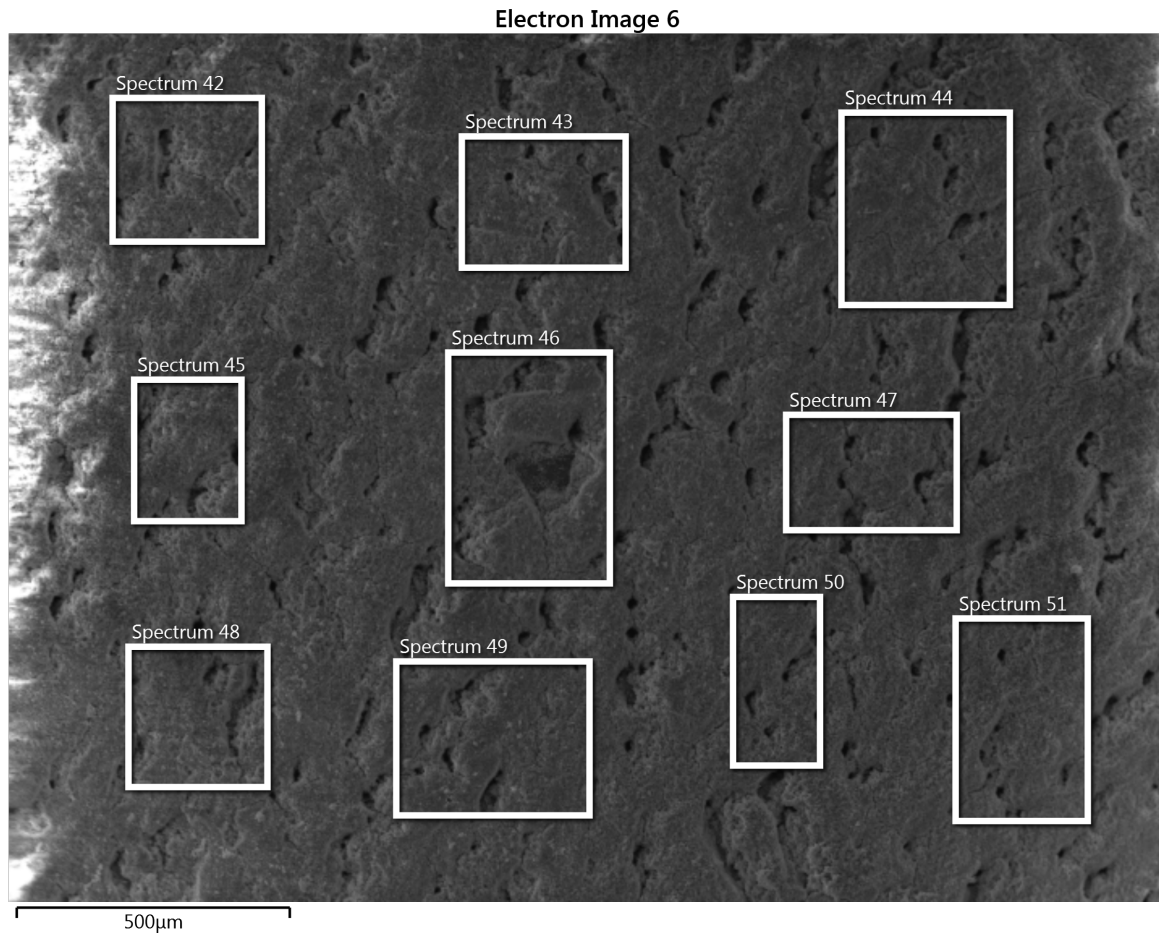

Figure S 8

Table S 6 Elemental EDS vales for the sections examined in the film in Figure S8.

| Spectrum Label | Spectrum 51 | Spectrum 42 | Spectrum 43 | Spectrum 44 | Spectrum 45 | Spectrum 46 | Spectrum 47 | Spectrum 48 | Spectrum 49 | Spectrum 50 |
|----------------|-------------|-------------|-------------|-------------|-------------|-------------|-------------|-------------|-------------|-------------|
| C              | 41.53       | 41.60       | 41.50       | 41.85       | 41.56       | 41.44       | 41.50       | 41.94       | 41.41       | 41.59       |
| O              | 28.66       | 28.60       | 28.67       | 28.24       | 27.77       | 29.30       | 28.45       | 27.56       | 27.92       | 28.70       |
| S              | 2.35        | 1.96        | 2.22        | 2.41        | 1.99        | 2.15        | 2.47        | 1.36        | 1.84        | 2.51        |
| Zr             | 27.46       | 27.84       | 27.61       | 27.50       | 28.68       | 27.12       | 27.57       | 29.14       | 28.83       | 27.20       |
| Total          | 100.00      | 100.00      | 100.00      | 100.00      | 100.00      | 100.00      | 100.00      | 100.00      | 100.00      | 100.00      |

| Statistics         | C     | O     | S    | Zr    |
|--------------------|-------|-------|------|-------|
| Max                | 41.94 | 29.30 | 2.51 | 29.14 |
| Min                | 41.41 | 27.56 | 1.36 | 27.12 |
| Average            | 41.59 | 28.39 | 2.13 | 27.90 |
| Standard Deviation | 0.17  | 0.52  | 0.35 | 0.72  |

4.6 Exp. 5: Dioxane ink printed (100 reps) and matured for 4 days at 25 °C.

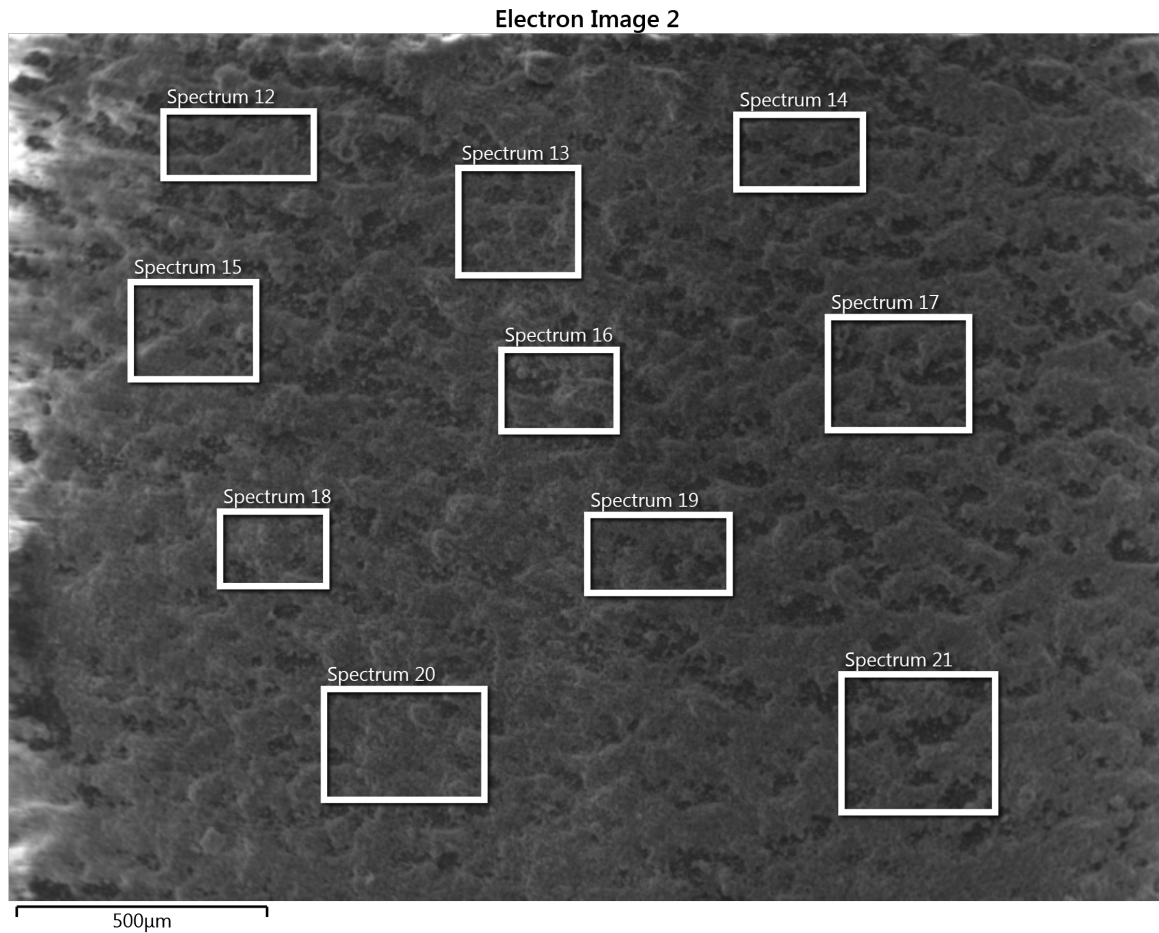

**Figure S 9**

**Table S 7** Elemental EDS vales for the sections examined in the film in Figure S 9.

| Spectrum Label | Spectrum 21 | Spectrum 12 | Spectrum 13 | Spectrum 14 | Spectrum 15 | Spectrum 16 | Spectrum 17 | Spectrum 18 | Spectrum 19 | Spectrum 20 |
|----------------|-------------|-------------|-------------|-------------|-------------|-------------|-------------|-------------|-------------|-------------|
| C              | 43.10       | 43.22       | 43.58       | 44.21       | 43.12       | 43.70       | 43.32       | 43.25       | 44.85       | 42.59       |
| O              | 31.89       | 31.21       | 30.18       | 30.97       | 30.87       | 30.64       | 31.25       | 30.24       | 30.58       | 29.76       |
| S              | 2.16        | 2.08        | 2.09        | 2.23        | 2.13        | 2.36        | 2.10        | 2.09        | 2.53        | 2.17        |
| Zr             | 22.85       | 23.49       | 24.14       | 22.59       | 24.88       | 23.30       | 23.33       | 24.42       | 22.04       | 25.48       |
| Total          | 100.00      | 100.00      | 100.00      | 100.00      | 100.00      | 100.00      | 100.00      | 100.00      | 100.00      | 100.00      |

| Statistics         | C     | O     | S    | Zr    |
|--------------------|-------|-------|------|-------|
| Max                | 44.85 | 31.89 | 2.53 | 25.48 |
| Min                | 42.59 | 29.76 | 2.08 | 22.04 |
| Average            | 43.50 | 30.66 | 2.19 | 23.65 |
| Standard Deviation | 0.64  | 0.68  | 0.15 | 1.07  |

4.7 Exp. 6: Dioxane ink printed (100 reps) and matured for 6 days at 25 °C.

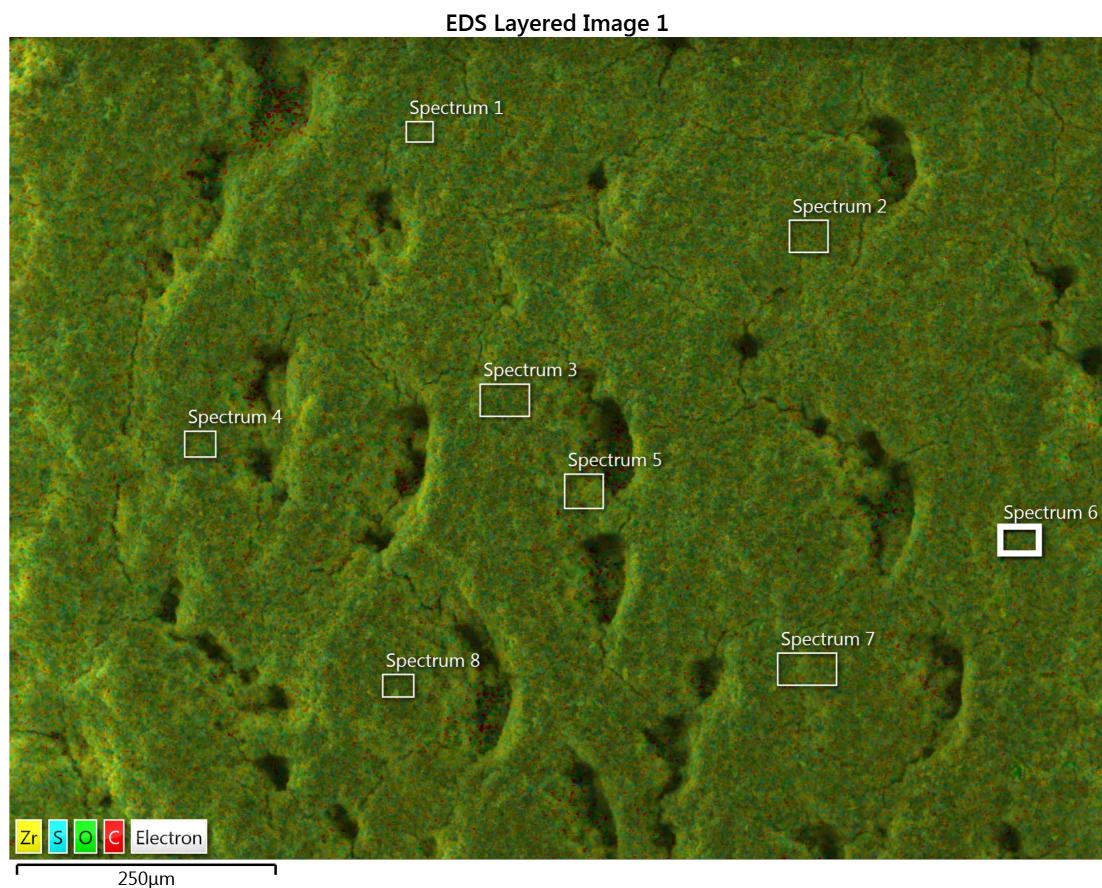

Figure S 10

Table S 8 Elemental EDS vales for the sections examined in the film in Figure S 10.

| Spectrum Label | Spectrum 8 | Spectrum 1 | Spectrum 2 | Spectrum 3 | Spectrum 4 | Spectrum 5 | Spectrum 6 | Spectrum 7 |
|----------------|------------|------------|------------|------------|------------|------------|------------|------------|
| C              | 42.63      | 44.06      | 43.44      | 42.65      | 42.86      | 42.67      | 42.94      | 43.53      |
| O              | 27.19      | 31.16      | 29.01      | 28.21      | 28.68      | 29.11      | 30.13      | 30.42      |
| S              | 2.68       | 2.62       | 2.77       | 3.16       | 3.01       | 2.41       | 2.75       | 2.54       |
| Zr             | 27.50      | 22.15      | 24.78      | 25.99      | 25.46      | 25.80      | 24.18      | 23.51      |
| Total          | 100.00     | 100.00     | 100.00     | 100.00     | 100.00     | 100.00     | 100.00     | 100.00     |

| Statistics         | C     | O     | S    | Zr    |
|--------------------|-------|-------|------|-------|
| Max                | 44.06 | 31.16 | 3.16 | 27.50 |
| Min                | 42.63 | 27.19 | 2.41 | 22.15 |
| Average            | 43.10 | 29.24 | 2.74 | 24.92 |
| Standard Deviation | 0.52  | 1.28  | 0.24 | 1.65  |

4.8 Exp. 7: Dioxane ink printed (50 reps) and matured for 2 days at 25 °C.

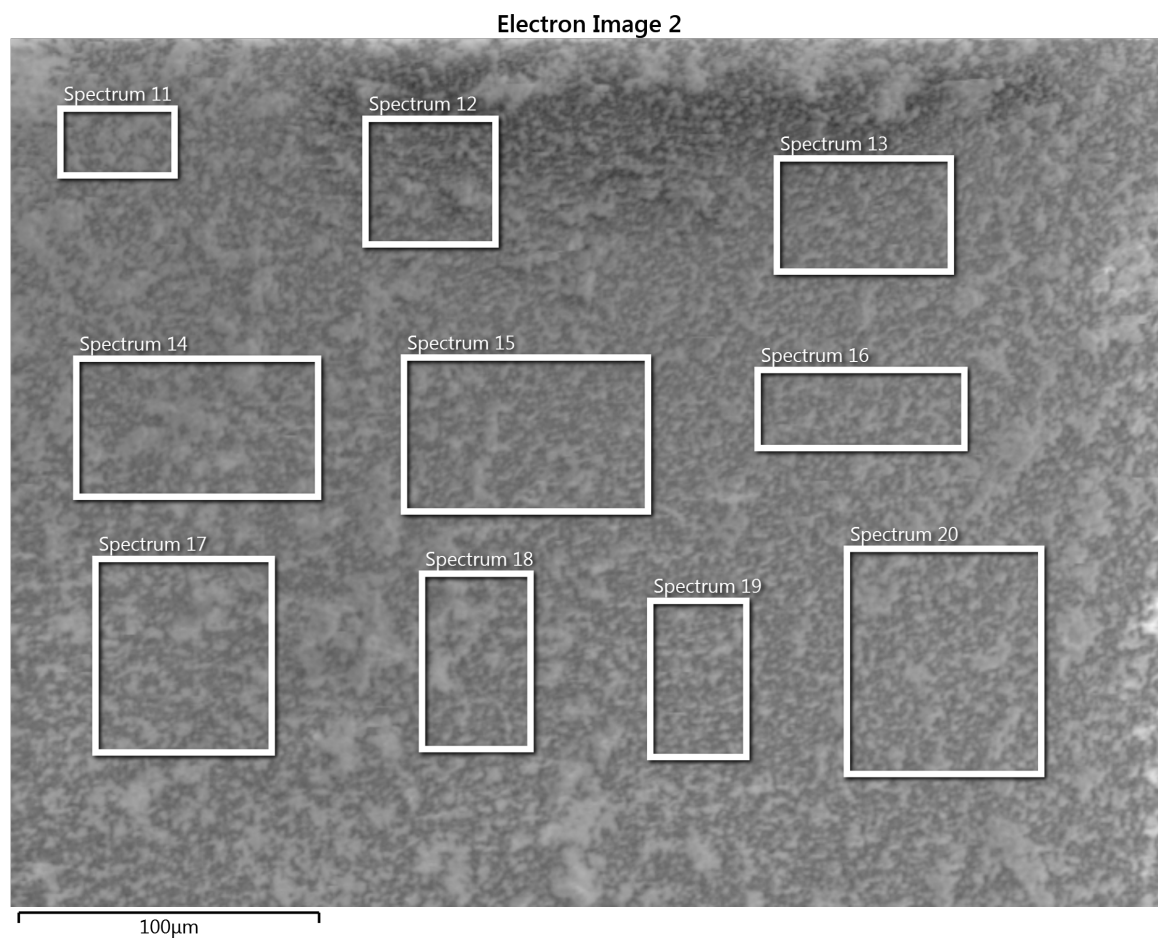

Figure S 11

Table S 9 Elemental EDS vales for the sections examined in the film in Figure S11.

| Spectrum Label | Spectrum 20 | Spectrum 11 | Spectrum 12 | Spectrum 13 | Spectrum 14 | Spectrum 15 | Spectrum 16 | Spectrum 17 | Spectrum 18 | Spectrum 19 |
|----------------|-------------|-------------|-------------|-------------|-------------|-------------|-------------|-------------|-------------|-------------|
| C              | 50.16       | 51.27       | 51.32       | 52.26       | 49.63       | 51.03       | 51.89       | 48.72       | 50.97       | 51.07       |
| O              | 35.47       | 33.30       | 34.41       | 34.83       | 33.97       | 35.52       | 35.32       | 35.79       | 34.80       | 35.33       |
| S              | 0.95        | 1.10        | 1.01        | 0.89        | 1.15        | 0.90        | 0.89        | 1.05        | 0.95        | 0.91        |
| Zr             | 13.41       | 14.33       | 13.26       | 12.02       | 15.25       | 12.55       | 11.90       | 14.44       | 13.28       | 12.69       |
| Total          | 100.00      | 100.00      | 100.00      | 100.00      | 100.00      | 100.00      | 100.00      | 100.00      | 100.00      | 100.00      |

| Statistics         | C     | O     | S    | Zr    |
|--------------------|-------|-------|------|-------|
| Max                | 52.26 | 35.79 | 1.15 | 15.25 |
| Min                | 48.72 | 33.30 | 0.89 | 11.90 |
| Average            | 50.83 | 34.88 | 0.98 | 13.31 |
| Standard Deviation | 1.06  | 0.78  | 0.09 | 1.09  |

4.9 Exp. 8: Dioxane ink printed (200 reps) and matured for 2 days at 25 °C.

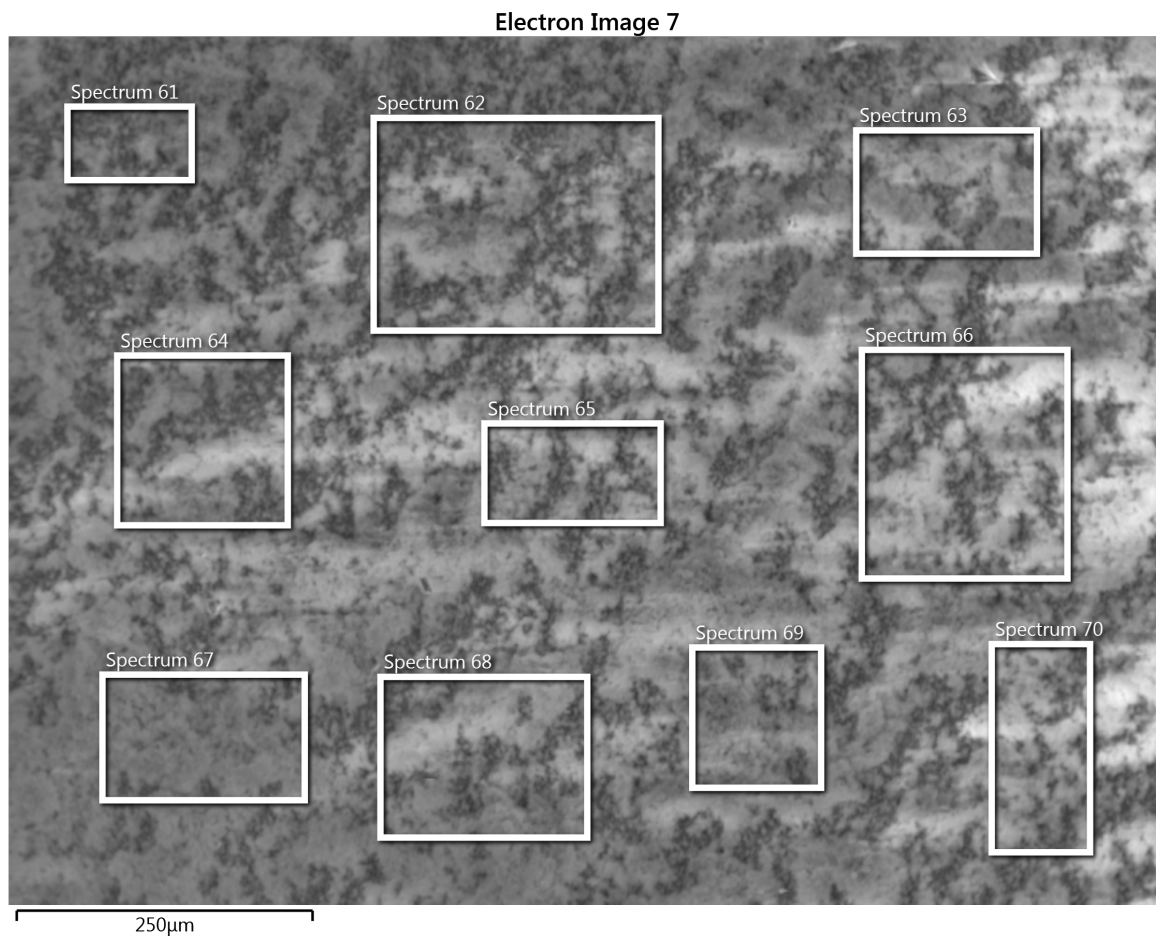

Figure S 12

**Table S 10** Elemental EDS vales for the sections examined in the film in Figure S12.

| Spectrum Label | Spectrum 70 | Spectrum 61 | Spectrum 62 | Spectrum 63 | Spectrum 64 | Spectrum 65 | Spectrum 66 | Spectrum 67 | Spectrum 68 | Spectrum 69 |
|----------------|-------------|-------------|-------------|-------------|-------------|-------------|-------------|-------------|-------------|-------------|
| C              | 41.22       | 42.46       | 41.33       | 42.17       | 41.01       | 40.02       | 41.12       | 42.72       | 41.07       | 43.26       |
| O              | 34.33       | 32.84       | 34.33       | 29.79       | 33.45       | 35.62       | 33.66       | 28.67       | 33.37       | 29.30       |
| S              | 2.95        | 2.99        | 3.00        | 3.52        | 3.15        | 2.92        | 3.15        | 3.46        | 3.09        | 3.51        |
| Zr             | 21.51       | 21.72       | 21.35       | 24.51       | 22.40       | 21.44       | 22.06       | 25.15       | 22.47       | 23.92       |
| Total          | 100.00      | 100.00      | 100.00      | 100.00      | 100.00      | 100.00      | 100.00      | 100.00      | 100.00      | 100.00      |

| Statistics         | C     | O     | S    | Zr    |
|--------------------|-------|-------|------|-------|
| Max                | 43.26 | 35.62 | 3.52 | 25.15 |
| Min                | 40.02 | 28.67 | 2.92 | 21.35 |
| Average            | 41.64 | 32.54 | 3.17 | 22.65 |
| Standard Deviation | 0.98  | 2.40  | 0.24 | 1.38  |

4.10 Exp. 9: Dioxane ink printed (100 reps) and matured for 0 days at 40 °C.

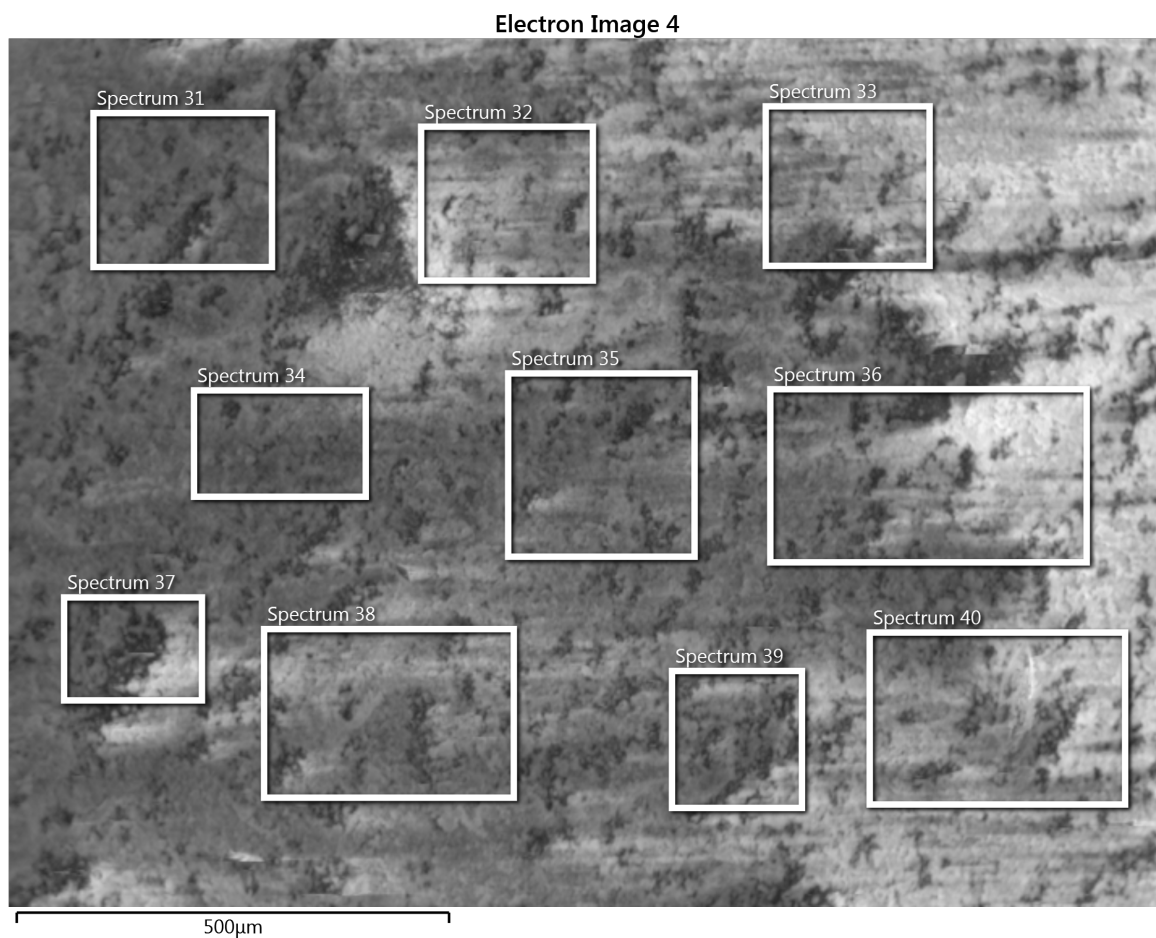

Figure S 13

Table S 11 Elemental EDS vales for the sections examined in the film in Figure S 13.

| Spectrum Label | Spectrum 40 | Spectrum 31 | Spectrum 32 | Spectrum 33 | Spectrum 34 | Spectrum 35 | Spectrum 36 | Spectrum 37 | Spectrum 38 | Spectrum 39 |
|----------------|-------------|-------------|-------------|-------------|-------------|-------------|-------------|-------------|-------------|-------------|
| C              | 40.91       | 40.11       | 40.48       | 41.26       | 41.59       | 40.64       | 40.25       | 38.58       | 40.42       | 39.03       |
| O              | 34.13       | 34.11       | 33.17       | 31.29       | 31.01       | 34.10       | 33.08       | 36.45       | 34.04       | 37.07       |
| S              | 0.93        | 1.01        | 0.92        | 0.97        | 0.98        | 0.95        | 0.94        | 0.94        | 0.99        | 0.92        |
| Zr             | 24.03       | 24.77       | 25.42       | 26.48       | 26.43       | 24.32       | 25.73       | 24.04       | 24.55       | 22.98       |
| Total          | 100.00      | 100.00      | 100.00      | 100.00      | 100.00      | 100.00      | 100.00      | 100.00      | 100.00      | 100.00      |

| Statistics         | C     | O     | S    | Zr    |
|--------------------|-------|-------|------|-------|
| Max                | 41.59 | 37.07 | 1.01 | 26.48 |
| Min                | 38.58 | 31.01 | 0.92 | 22.98 |
| Average            | 40.33 | 33.84 | 0.95 | 24.87 |
| Standard Deviation | 0.93  | 1.92  | 0.03 | 1.13  |

4.11 Exp. 10: Dioxane ink printed (100 reps) and matured for 1 days at 40 °C.

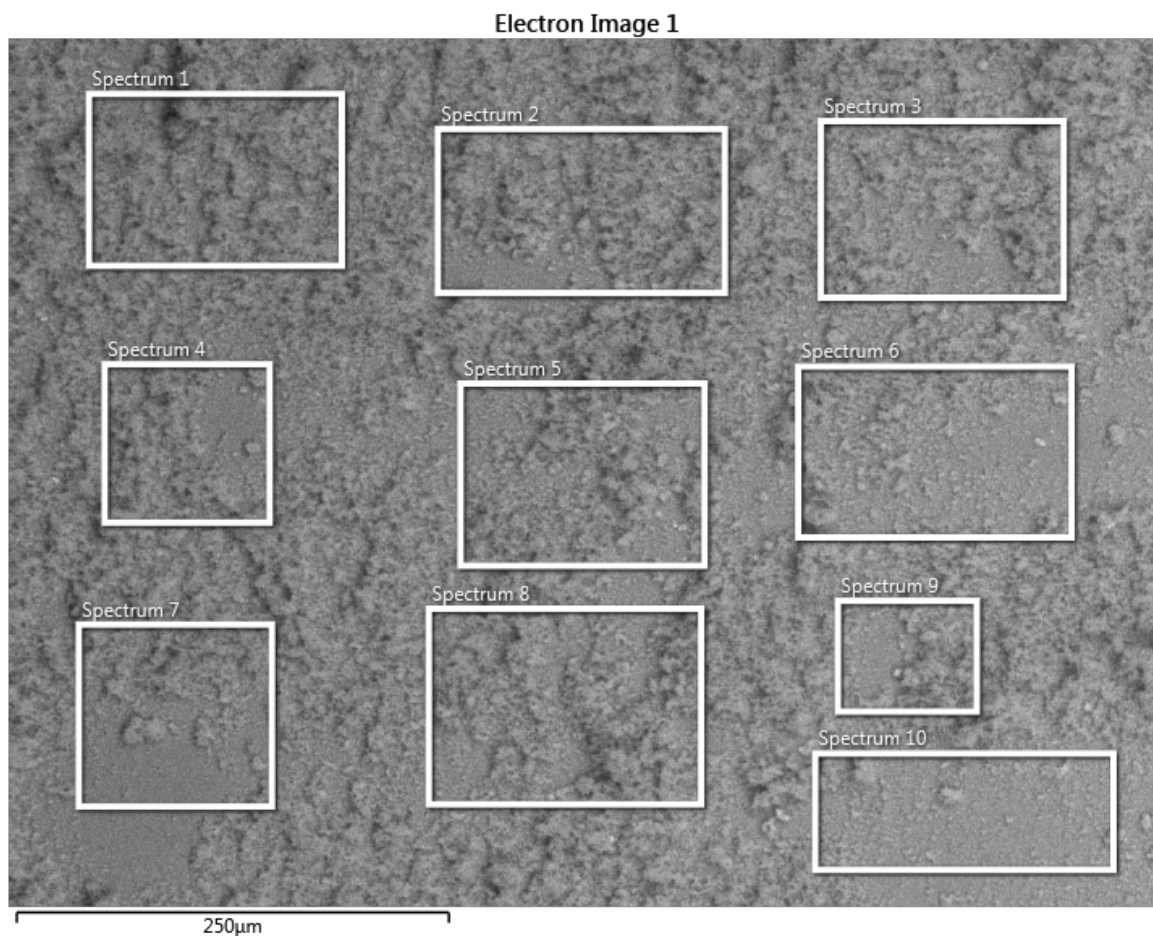

**Figure S 14**

**Table S 12** Elemental EDS vales for the sections examined in the film in Figure S 14.

| Spectrum Label | Spectrum 10 | Spectrum 1 | Spectrum 2 | Spectrum 3 | Spectrum 4 | Spectrum 5 | Spectrum 6 | Spectrum 7 | Spectrum 8 | Spectrum 9 |
|----------------|-------------|------------|------------|------------|------------|------------|------------|------------|------------|------------|
| C              | 32.81       | 38.21      | 37.73      | 36.91      | 37.12      | 37.41      | 35.33      | 34.86      | 38.00      | 36.30      |
| O              | 46.48       | 38.35      | 39.36      | 40.46      | 40.50      | 39.58      | 43.15      | 43.49      | 38.88      | 41.09      |
| S              | 1.28        | 1.53       | 1.50       | 1.49       | 1.50       | 1.53       | 1.26       | 1.32       | 1.45       | 1.39       |
| Zr             | 19.44       | 21.92      | 21.41      | 21.14      | 20.88      | 21.48      | 20.26      | 20.34      | 21.67      | 21.22      |
| Total          | 100.00      | 100.00     | 100.00     | 100.00     | 100.00     | 100.00     | 100.00     | 100.00     | 100.00     | 100.00     |

| Statistics         | C     | O     | S    | Zr    |
|--------------------|-------|-------|------|-------|
| Max                | 38.21 | 46.48 | 1.53 | 21.92 |
| Min                | 32.81 | 38.35 | 1.26 | 19.44 |
| Average            | 36.47 | 41.13 | 1.42 | 20.97 |
| Standard Deviation | 1.69  | 2.53  | 0.10 | 0.76  |

#### 4.12 Exp. 11: Dioxane ink printed (100 reps) and matured for 2 days at 40 °C.

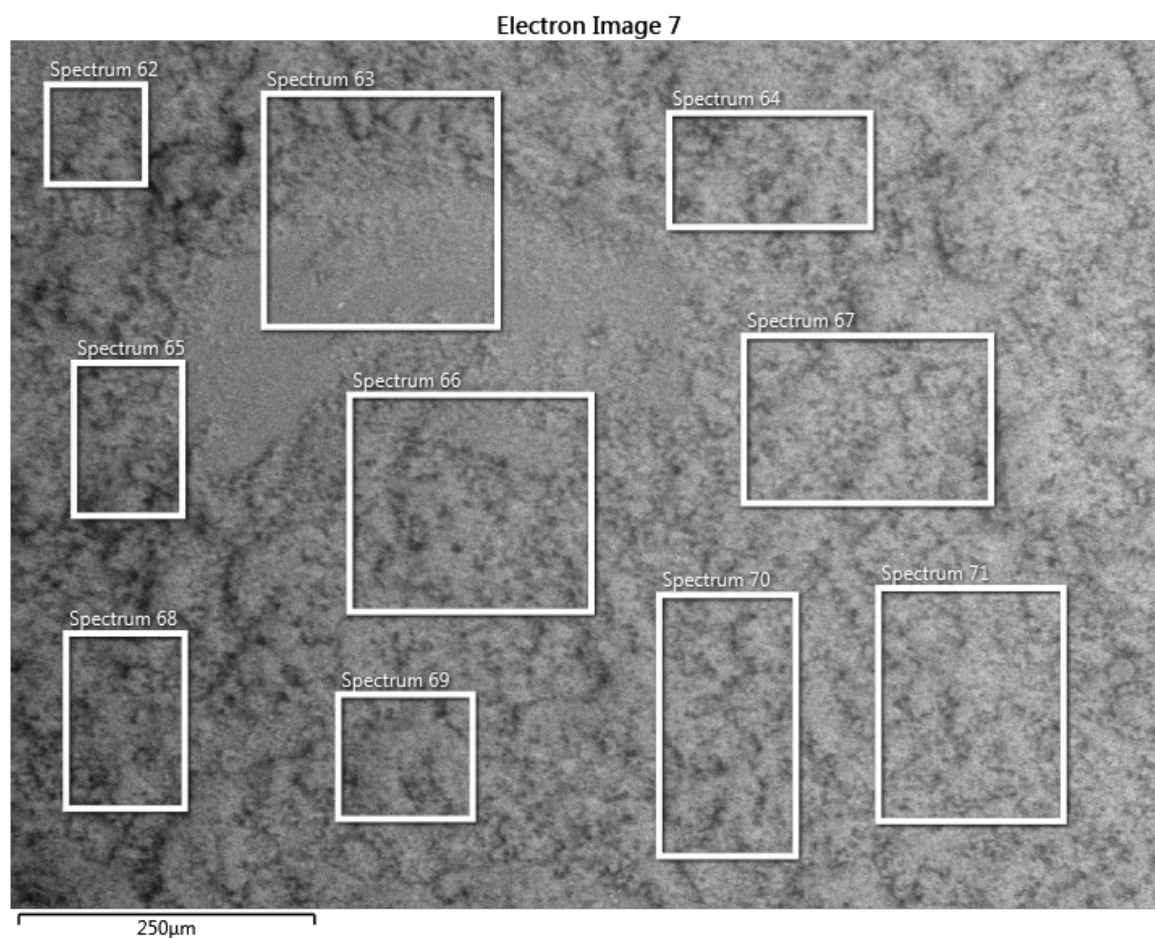

Figure S 15

**Table S 13** Elemental EDS vales for the sections examined in the film in Figure S 15.

| Spectrum Label | Spectrum 71 | Spectrum 62 | Spectrum 63 | Spectrum 64 | Spectrum 65 | Spectrum 66 | Spectrum 67 | Spectrum 68 | Spectrum 69 | Spectrum 70 |
|----------------|-------------|-------------|-------------|-------------|-------------|-------------|-------------|-------------|-------------|-------------|
| C              | 41.66       | 43.01       | 40.67       | 42.68       | 44.10       | 43.34       | 42.48       | 45.05       | 44.32       | 43.31       |
| O              | 31.73       | 32.31       | 34.73       | 30.98       | 30.27       | 30.45       | 31.28       | 28.98       | 28.85       | 29.82       |
| S              | 2.52        | 2.42        | 2.33        | 2.50        | 2.35        | 2.49        | 2.45        | 2.41        | 2.52        | 2.47        |
| Zr             | 24.09       | 22.27       | 22.27       | 23.84       | 23.28       | 23.71       | 23.79       | 23.56       | 24.31       | 24.39       |
| Total          | 100.00      | 100.00      | 100.00      | 100.00      | 100.00      | 100.00      | 100.00      | 100.00      | 100.00      | 100.00      |

| Statistics         | C     | O     | S    | Zr    |
|--------------------|-------|-------|------|-------|
| Max                | 45.05 | 34.73 | 2.52 | 24.39 |
| Min                | 40.67 | 28.85 | 2.33 | 22.27 |
| Average            | 43.06 | 30.94 | 2.45 | 23.55 |
| Standard Deviation | 1.29  | 1.74  | 0.07 | 0.75  |

#### 4.13 Exp. 12: Dioxane ink printed (100 reps) and matured for 0 days at 70 °C.

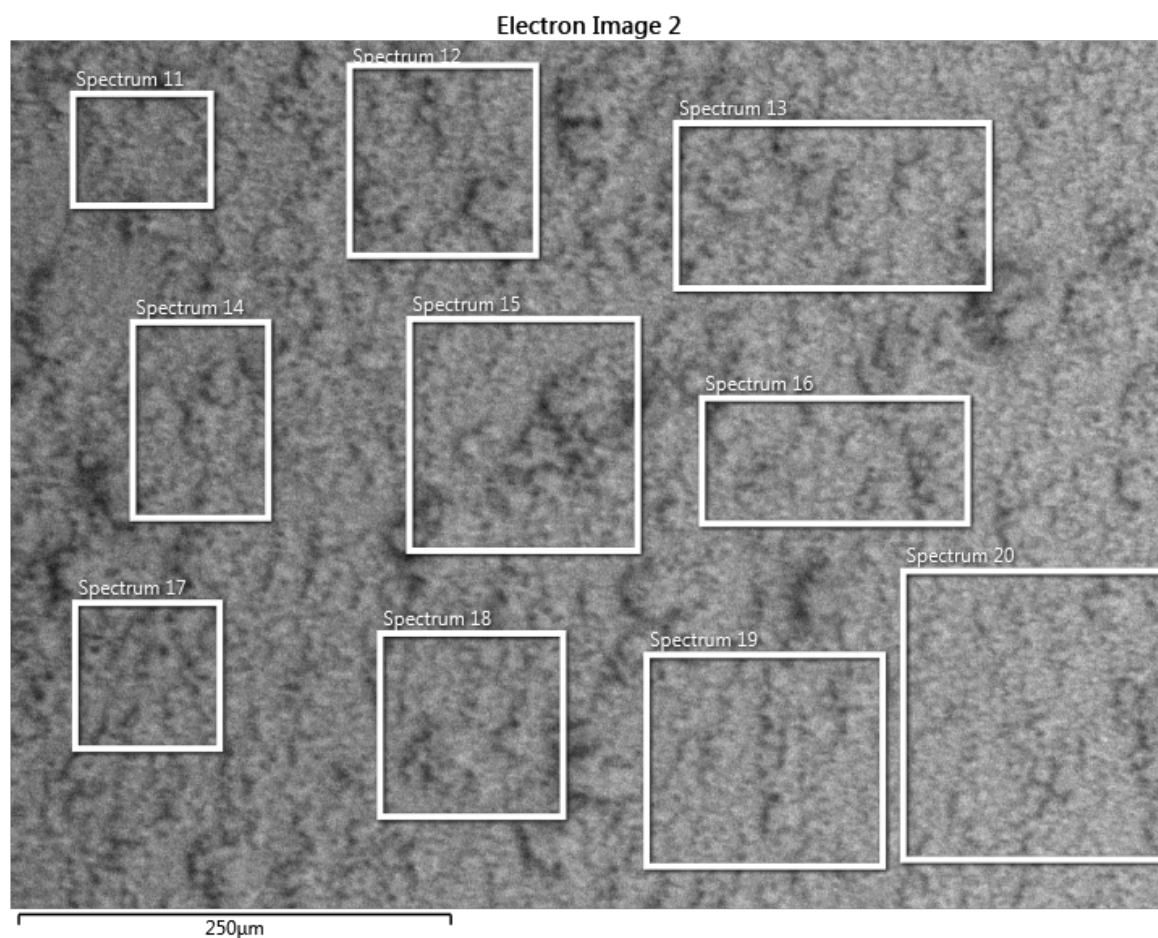

**Figure S 16**

**Table S 14** Elemental EDS vales for the sections examined in the film in Figure S 16.

| Spectrum Label | Spectrum 20 | Spectrum 11 | Spectrum 12 | Spectrum 13 | Spectrum 14 | Spectrum 15 | Spectrum 16 | Spectrum 17 | Spectrum 18 | Spectrum 19 |
|----------------|-------------|-------------|-------------|-------------|-------------|-------------|-------------|-------------|-------------|-------------|
| C              | 40.79       | 41.50       | 42.10       | 41.73       | 41.87       | 42.06       | 41.54       | 41.90       | 41.44       | 41.69       |
| O              | 34.80       | 34.87       | 33.70       | 33.81       | 34.40       | 33.65       | 33.87       | 33.46       | 33.69       | 33.82       |
| S              | 1.36        | 1.23        | 1.25        | 1.38        | 1.21        | 1.40        | 1.44        | 1.29        | 1.40        | 1.39        |
| Zr             | 23.05       | 22.40       | 22.94       | 23.08       | 22.51       | 22.89       | 23.15       | 23.34       | 23.47       | 23.09       |
| Total          | 100.00      | 100.00      | 100.00      | 100.00      | 100.00      | 100.00      | 100.00      | 100.00      | 100.00      | 100.00      |

| Statistics         | C     | O     | S    | Zr    |
|--------------------|-------|-------|------|-------|
| Max                | 42.10 | 34.87 | 1.44 | 23.47 |
| Min                | 40.79 | 33.46 | 1.21 | 22.40 |
| Average            | 41.66 | 34.01 | 1.34 | 22.99 |
| Standard Deviation | 0.38  | 0.50  | 0.08 | 0.33  |

#### 4.14 Exp. 13: Dioxane ink printed (100 reps) and matured for 1 days at 70 °C.

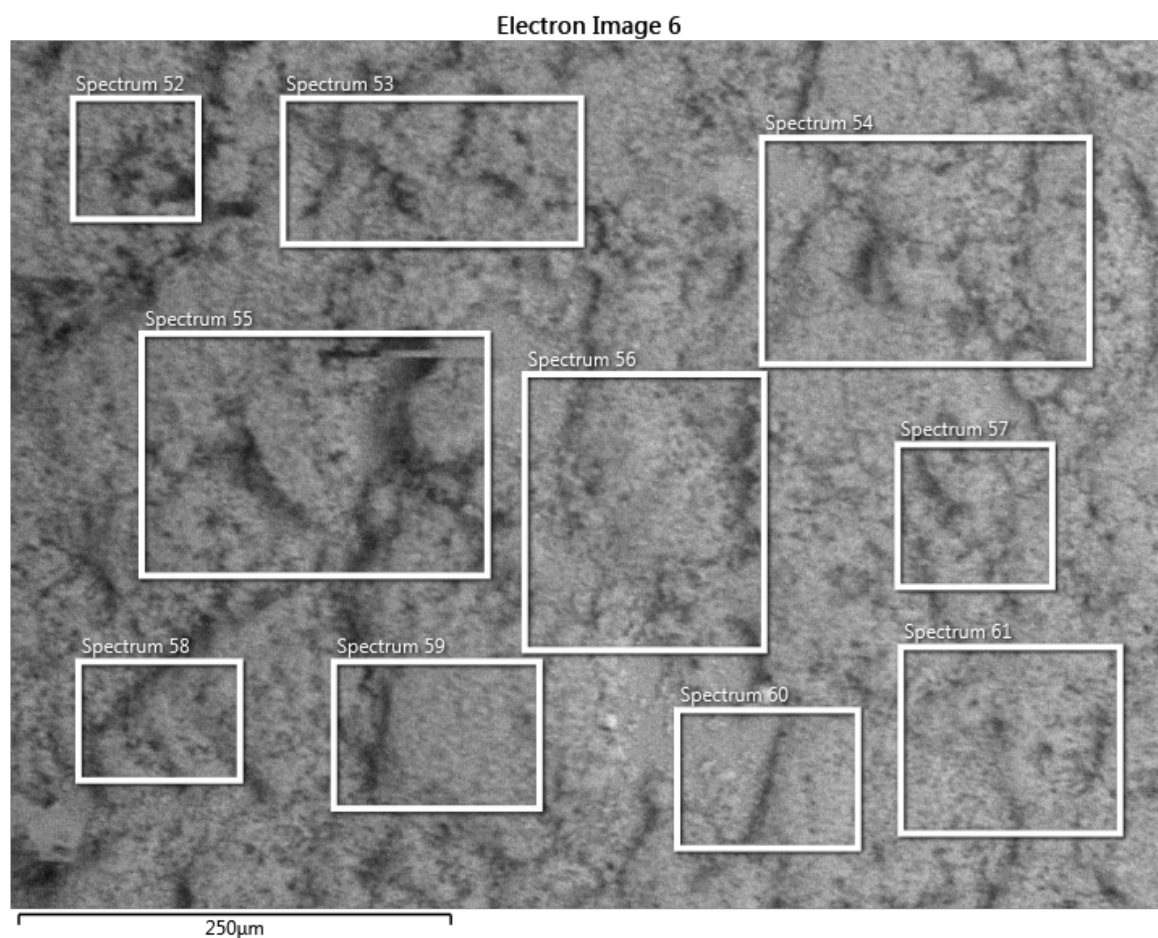

**Figure S 17**

**Table S 15** Elemental EDS vales for the sections examined in the film in Figure S 17.

| Spectrum Label | Spectrum 61 | Spectrum 52 | Spectrum 53 | Spectrum 54 | Spectrum 55 | Spectrum 56 | Spectrum 57 | Spectrum 58 | Spectrum 59 | Spectrum 60 |
|----------------|-------------|-------------|-------------|-------------|-------------|-------------|-------------|-------------|-------------|-------------|
| C              | 44.79       | 44.32       | 45.02       | 44.31       | 44.31       | 44.87       | 44.96       | 44.26       | 44.77       | 44.03       |
| O              | 27.08       | 27.12       | 26.59       | 27.32       | 27.28       | 26.81       | 26.79       | 26.27       | 27.08       | 28.66       |
| S              | 2.12        | 2.09        | 2.05        | 2.09        | 2.03        | 2.07        | 1.99        | 2.22        | 2.12        | 1.99        |
| Zr             | 26.00       | 26.47       | 26.34       | 26.29       | 26.38       | 26.25       | 26.26       | 27.25       | 26.03       | 25.32       |
| Total          | 100.00      | 100.00      | 100.00      | 100.00      | 100.00      | 100.00      | 100.00      | 100.00      | 100.00      | 100.00      |

| Statistics         | C     | O     | S    | Zr    |
|--------------------|-------|-------|------|-------|
| Max                | 45.02 | 28.66 | 2.22 | 27.25 |
| Min                | 44.03 | 26.27 | 1.99 | 25.32 |
| Average            | 44.57 | 27.10 | 2.08 | 26.26 |
| Standard Deviation | 0.35  | 0.64  | 0.07 | 0.48  |

4.15 Exp. 14: Dioxane ink printed (100 reps) and matured for 2 days at 70 °C.

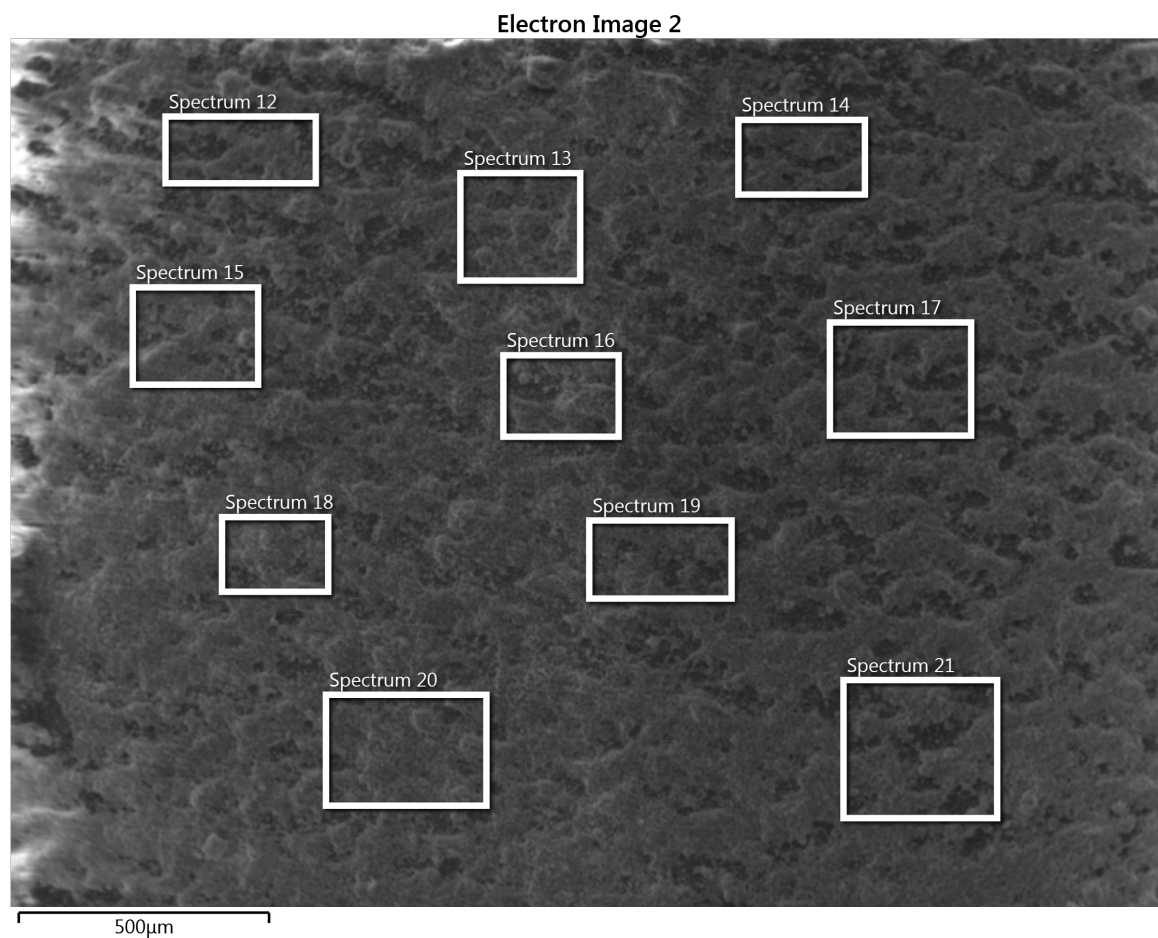

Figure S 18

Table S 16 Elemental EDS vales for the sections examined in the film in Figure S 18.

| Spectrum Label | Spectrum 21 | Spectrum 12 | Spectrum 13 | Spectrum 14 | Spectrum 15 | Spectrum 16 | Spectrum 17 | Spectrum 18 | Spectrum 19 | Spectrum 20 |
|----------------|-------------|-------------|-------------|-------------|-------------|-------------|-------------|-------------|-------------|-------------|
| C              | 43.10       | 43.22       | 43.58       | 44.21       | 43.12       | 43.70       | 43.32       | 43.25       | 44.85       | 42.59       |
| O              | 30.89       | 30.21       | 29.18       | 29.97       | 28.87       | 29.64       | 30.25       | 29.24       | 29.58       | 28.76       |
| S              | 3.16        | 3.08        | 3.09        | 3.23        | 3.13        | 3.36        | 3.10        | 3.09        | 3.53        | 3.17        |
| Sr             |             |             | 0.00        |             |             |             |             |             |             |             |
| Zr             | 22.85       | 23.49       | 24.14       | 22.59       | 24.88       | 23.30       | 23.33       | 24.42       | 22.04       | 25.48       |
| Total          | 100.00      | 100.00      | 100.00      | 100.00      | 100.00      | 100.00      | 100.00      | 100.00      | 100.00      | 100.00      |

| Statistics         | C     | O     | S    | Zr    |
|--------------------|-------|-------|------|-------|
| Max                | 44.85 | 30.89 | 3.53 | 25.48 |
| Min                | 42.59 | 28.76 | 3.08 | 22.04 |
| Average            | 43.50 | 29.66 | 3.19 | 23.65 |
| Standard Deviation | 0.64  | 0.68  | 0.15 | 1.07  |

## 5 Top-down optical images of films printed and matured at different temperatures

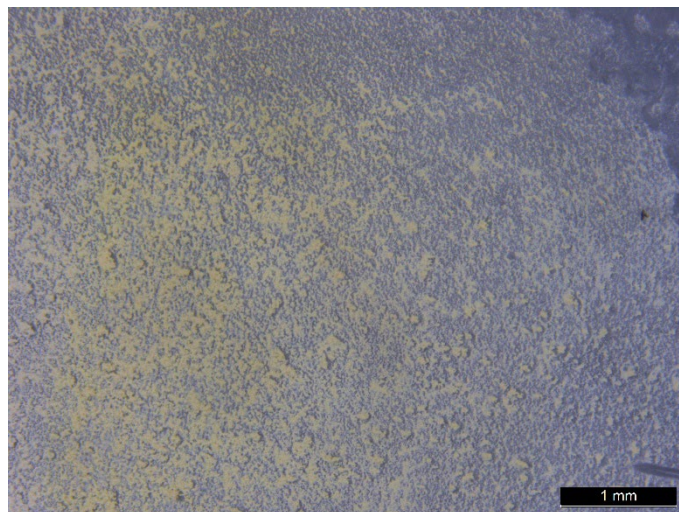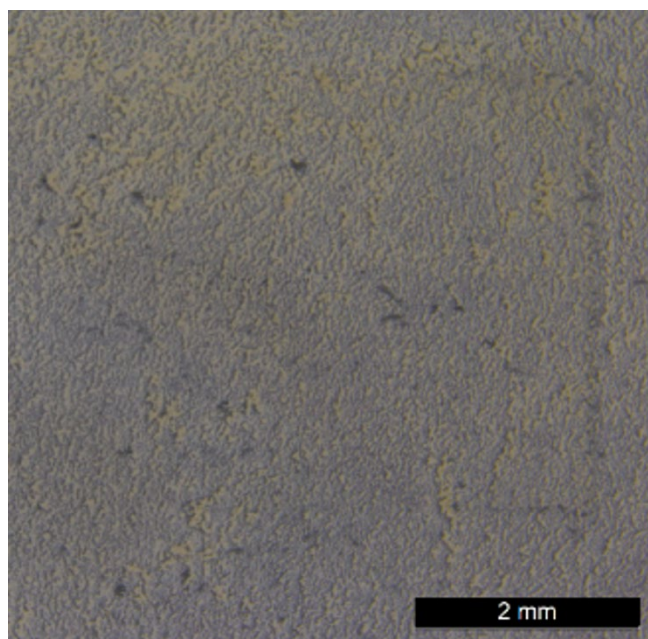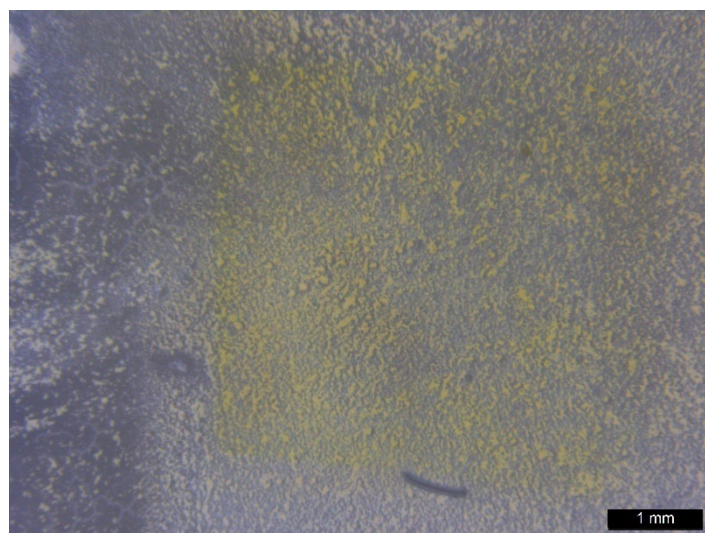

**Figure S 19** Optical images of printing 100 reps and maturing at 25 °C at day 0 (top), day 1 (middle) and day 2 (bottom).

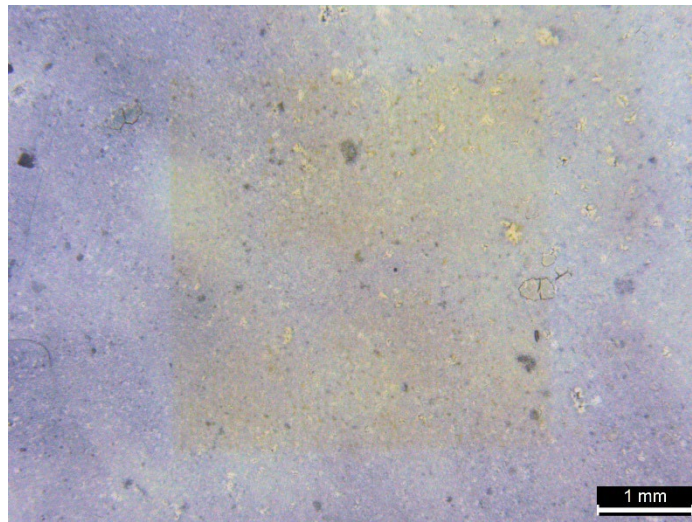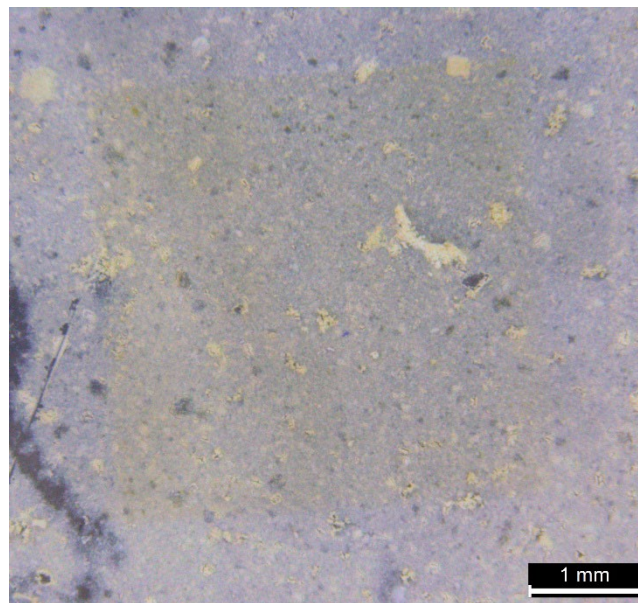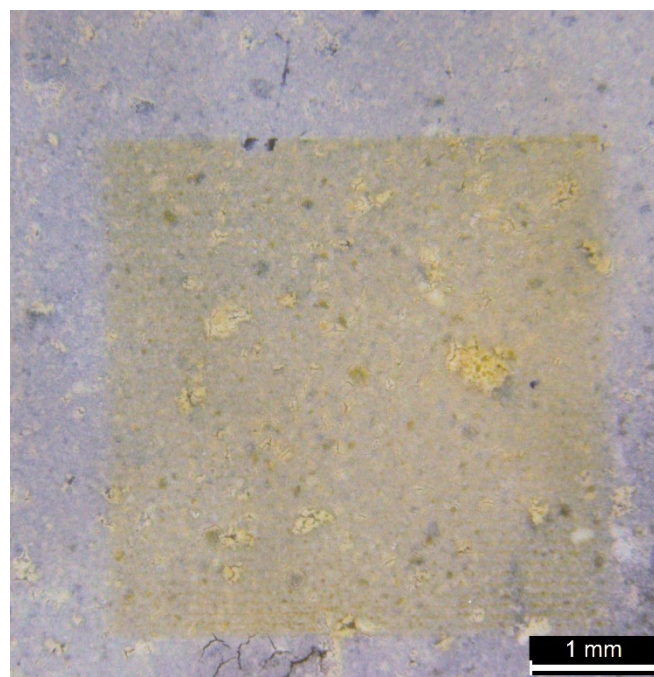

**Figure S 20** Optical images of printing 100 reps and maturing at 40 °C at day 0 (top), day 1 (middle) and day 2 (bottom).

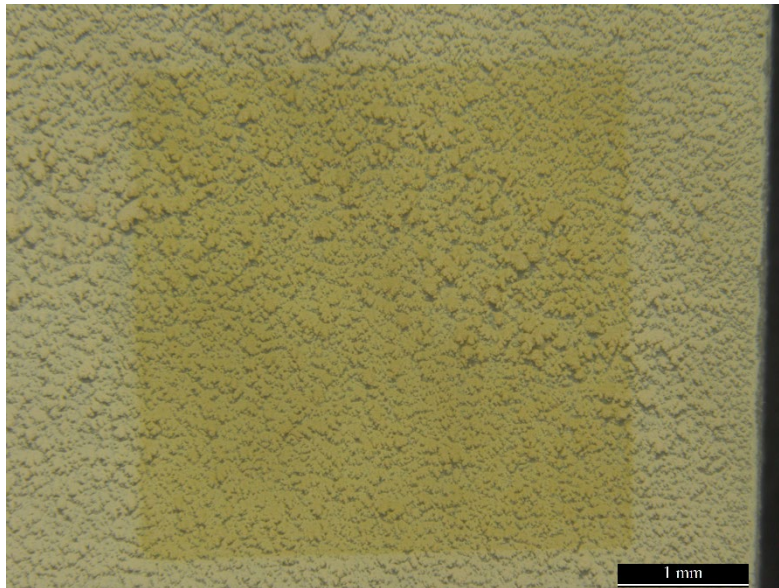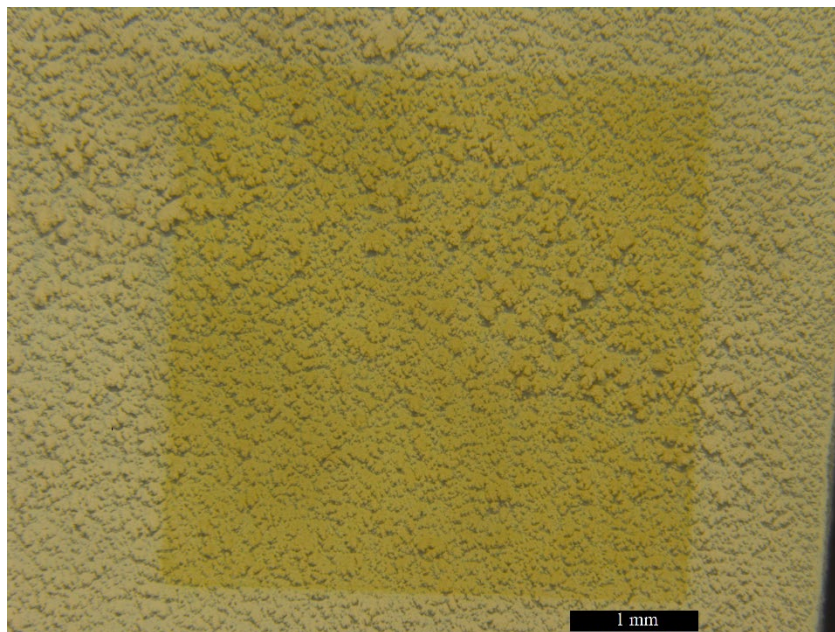

**Figure S 21** Optical images of printing 100 reps and maturing at 70 °C at day 1 (top) and day 2 (bottom).

## 6 SEM-EDS analyses of film cross sections

### 6.1 Dioxane printed (100 reps) and matured for 0 days at 25 °C.

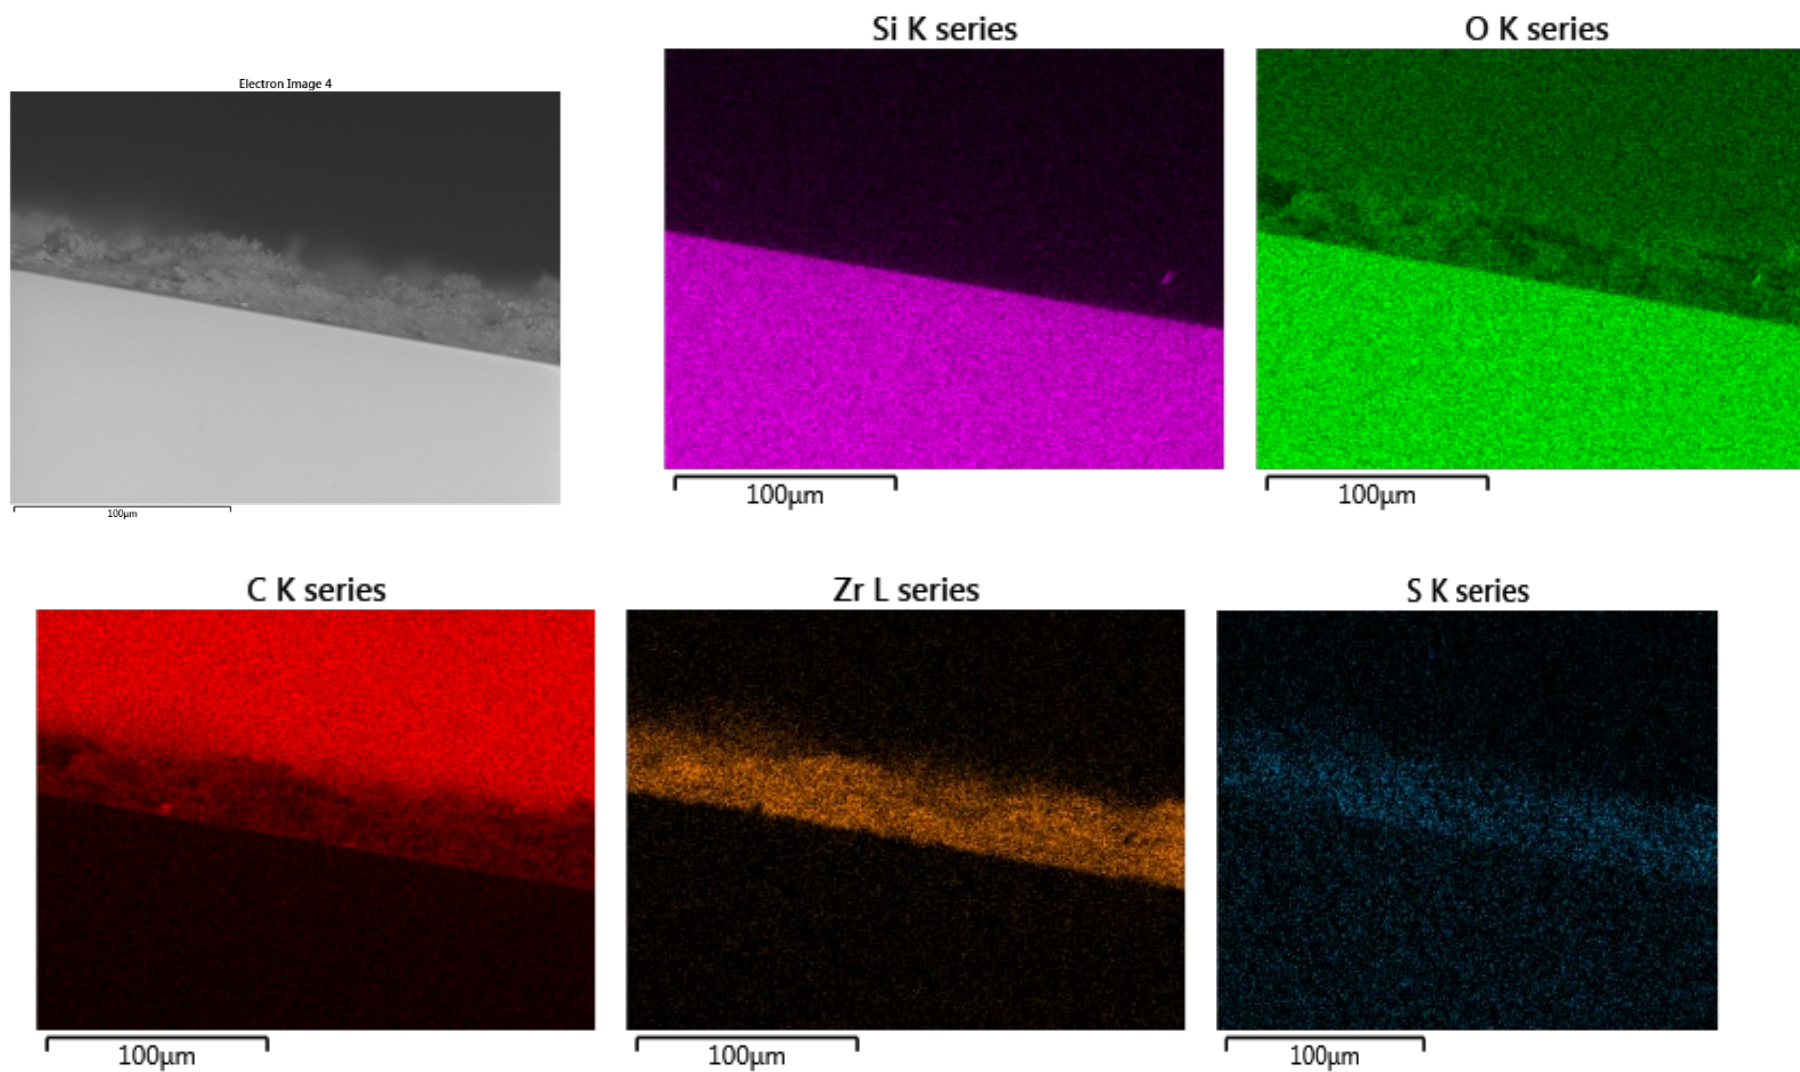

Figure S 22

6.2 Dioxane printed (100 reps) and matured for 2 days at 25 °C.

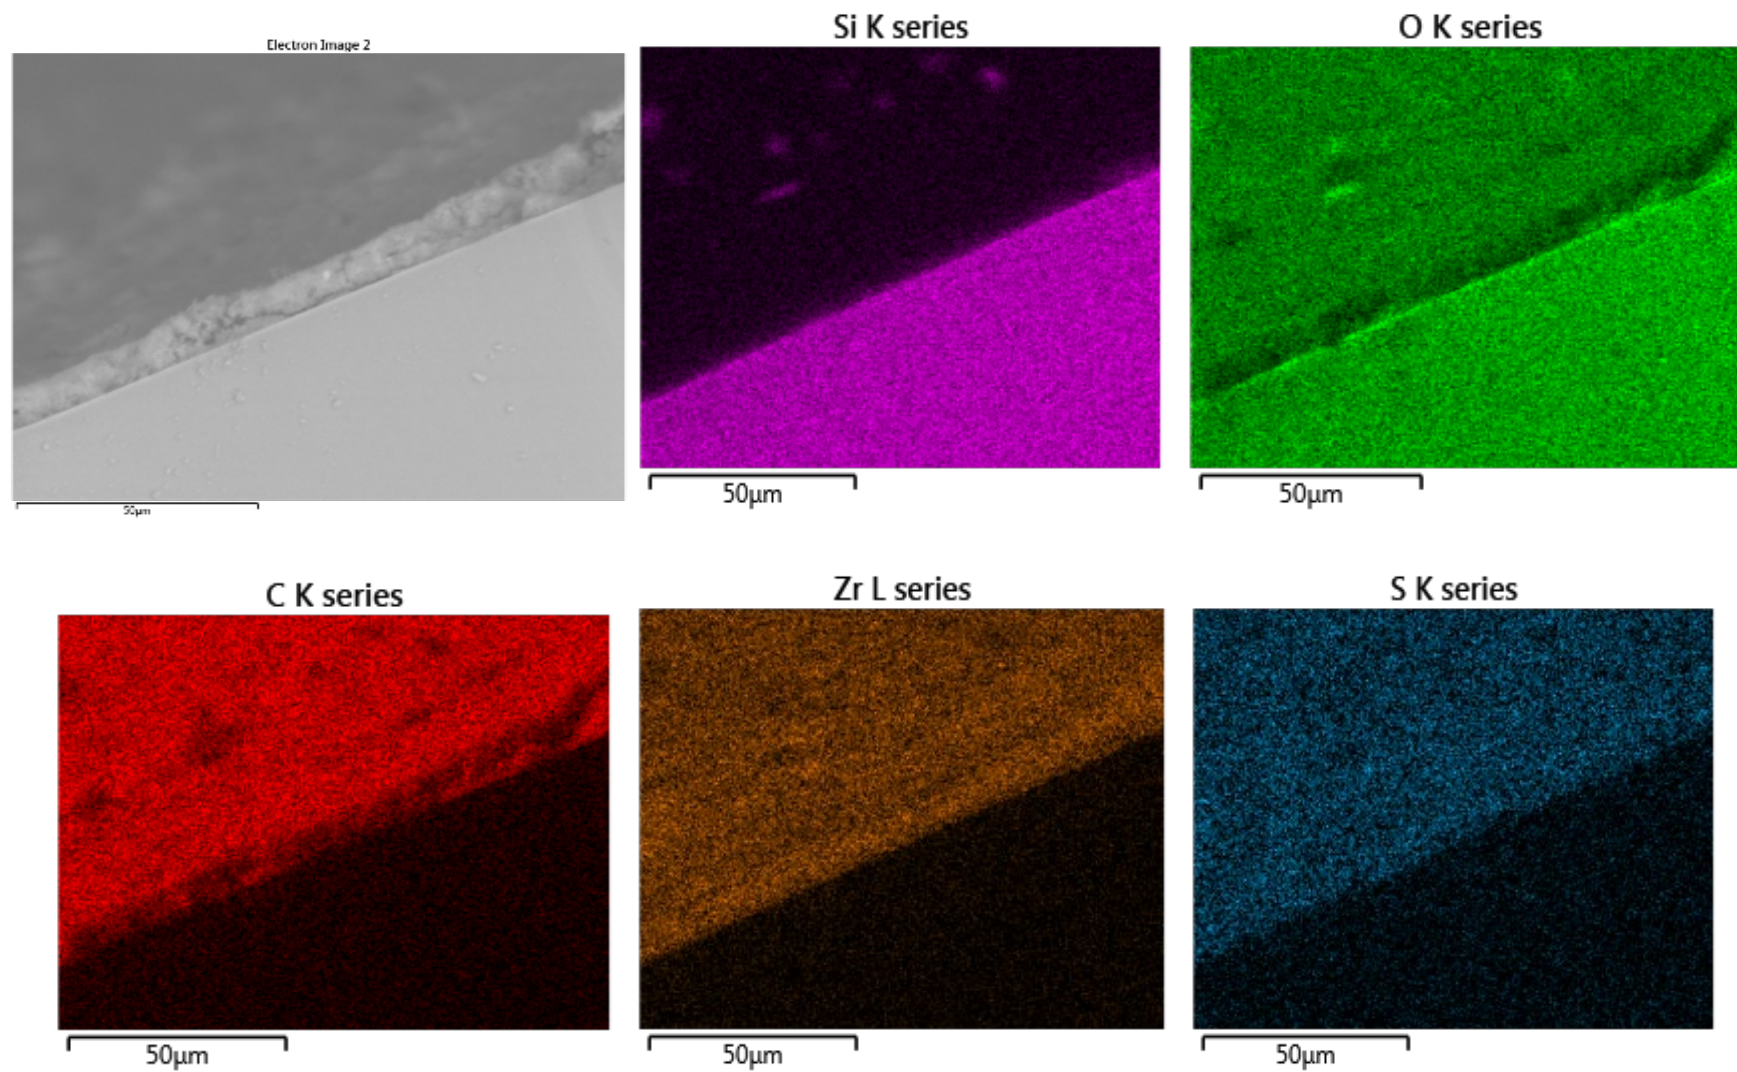

Figure S 23

6.3 Dioxane printed (100 reps) and matured for 0 days at 70 °C.

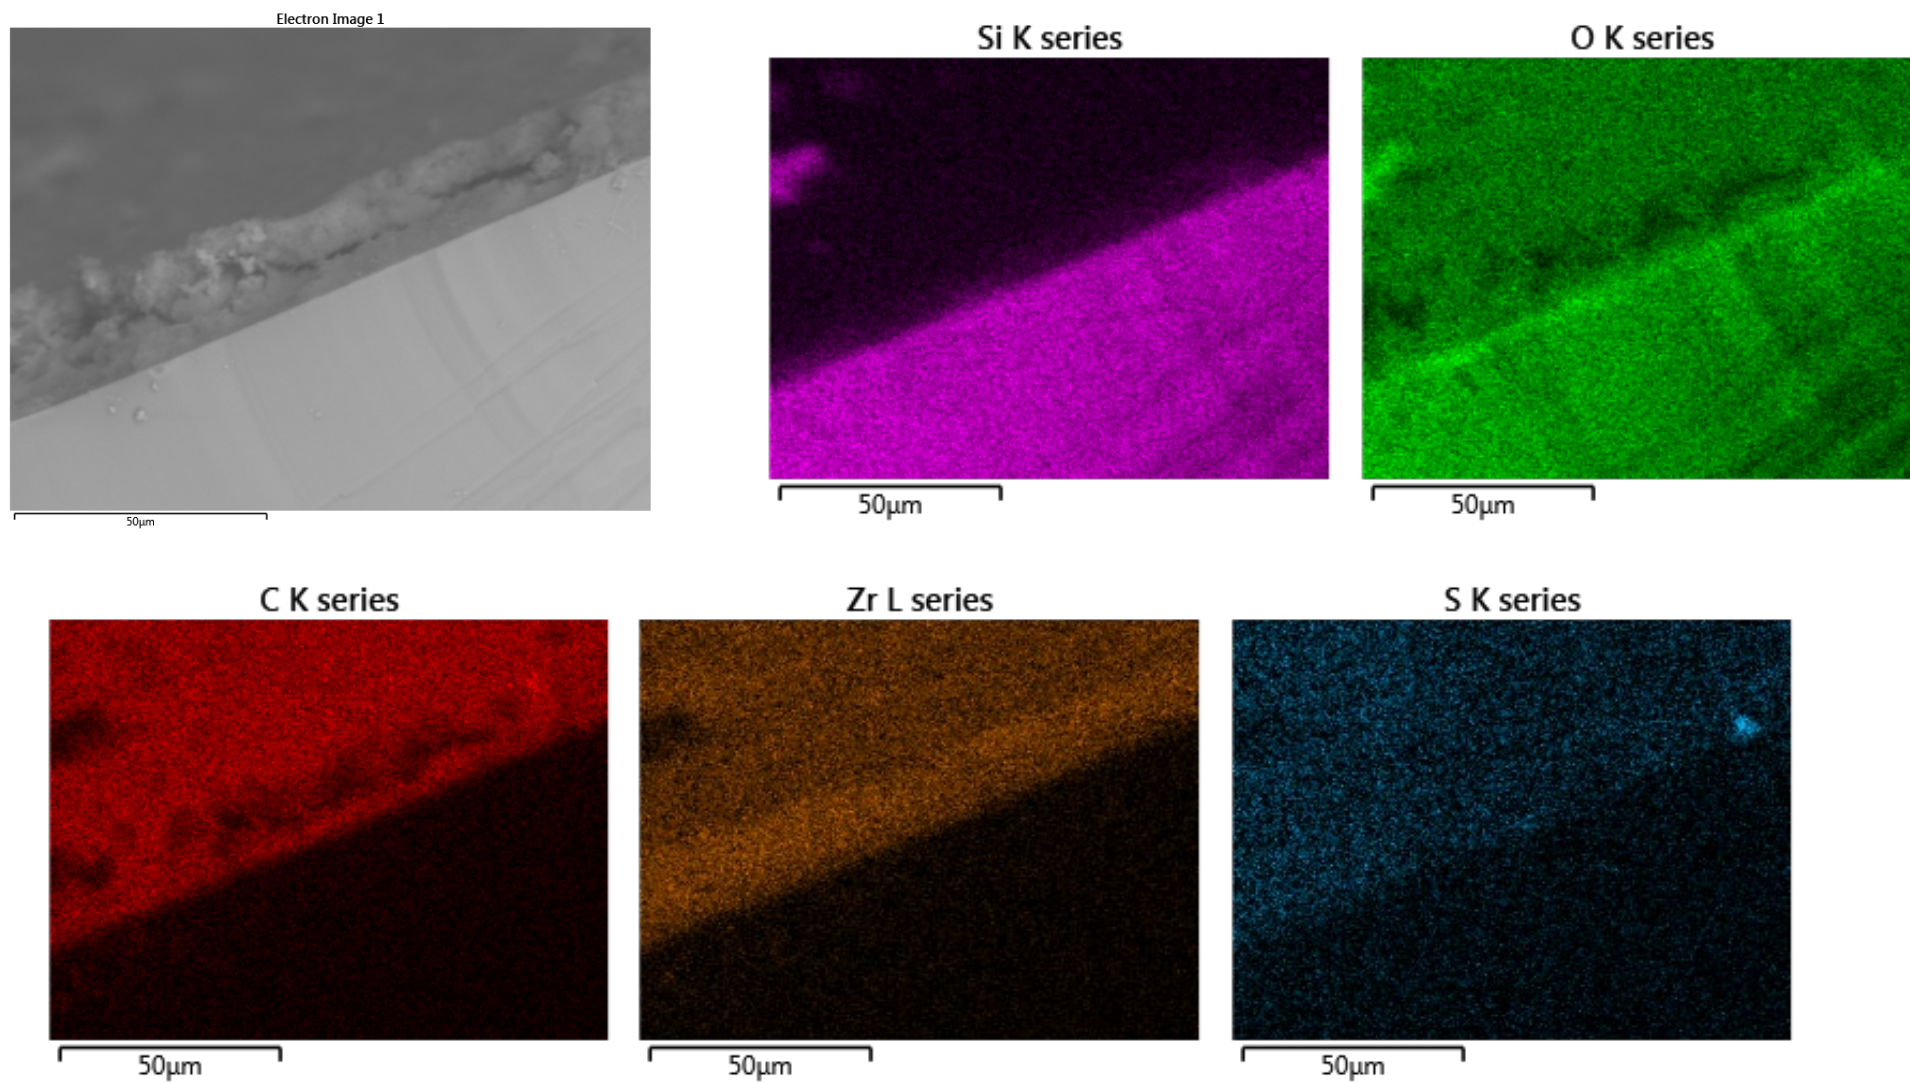

Figure S 24

6.4 Dioxane printed (100 reps) and matured for 2 days at 70 °C.

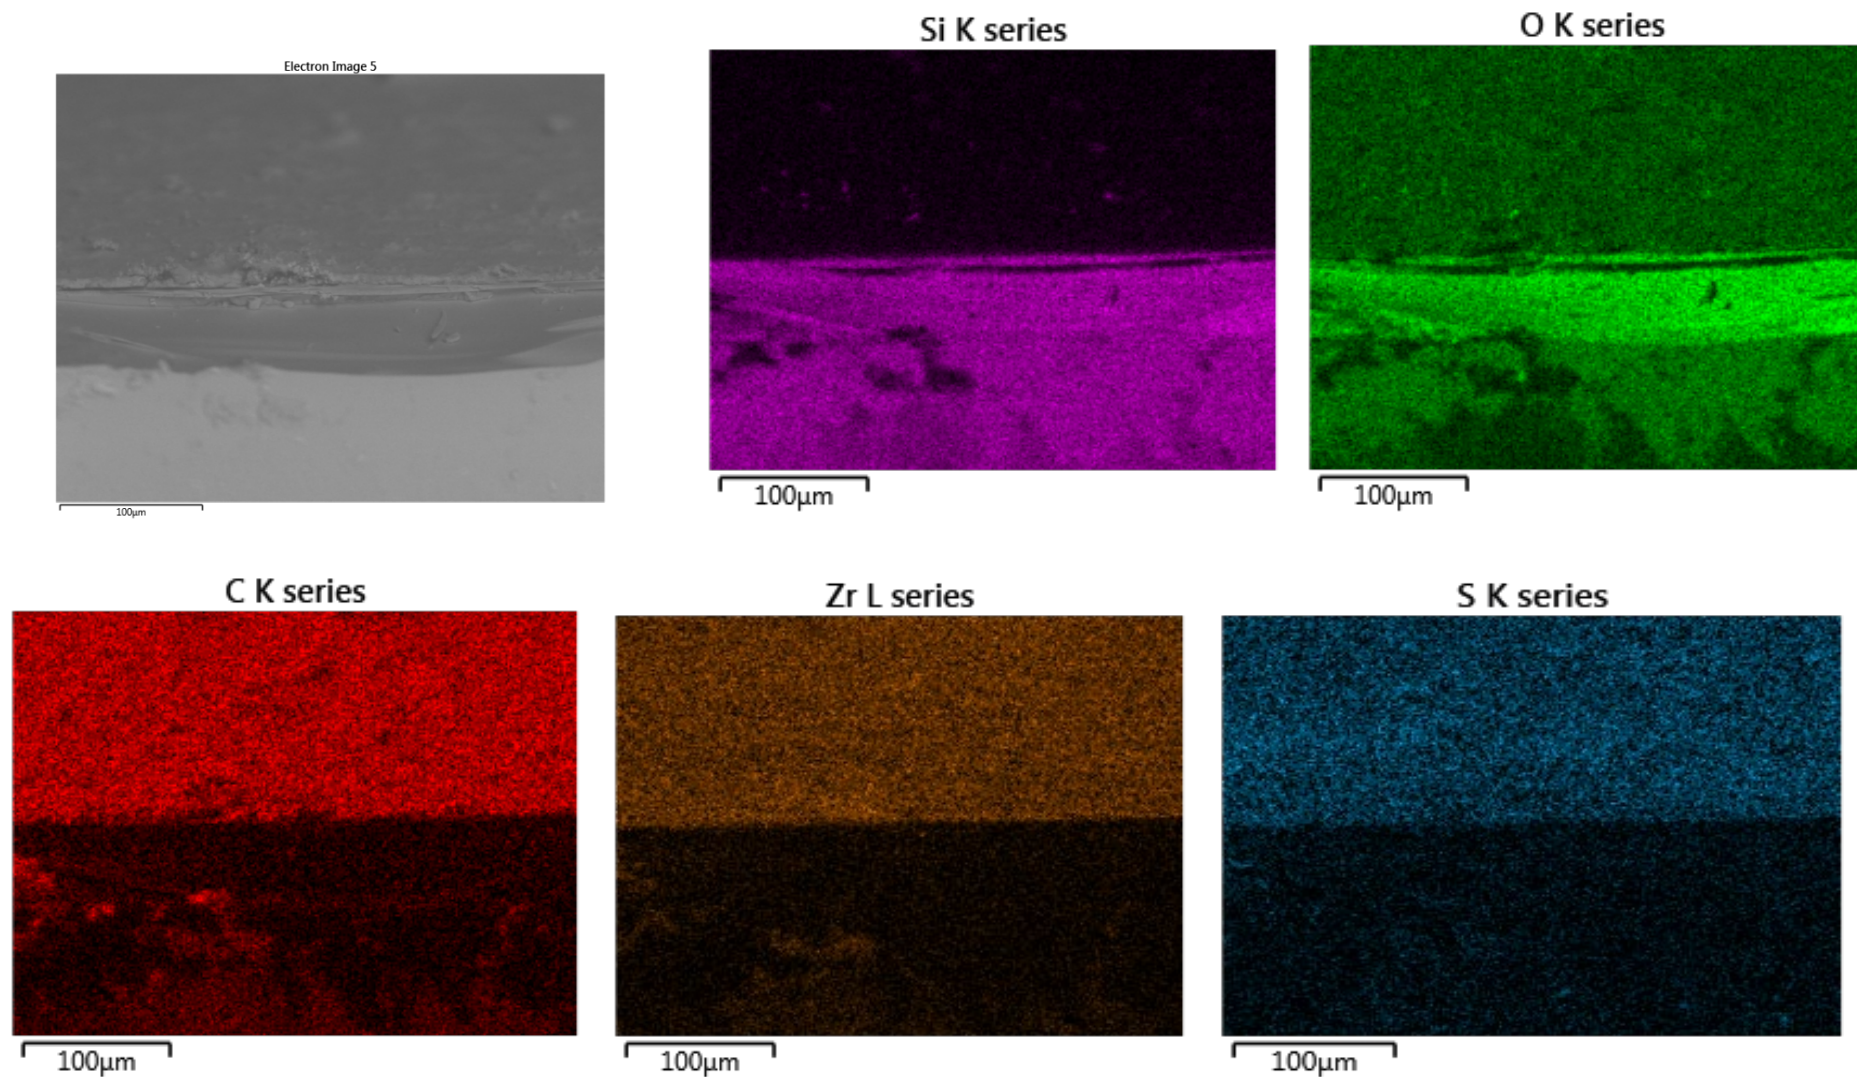

Figure S 25

## 7 Gas adsorption

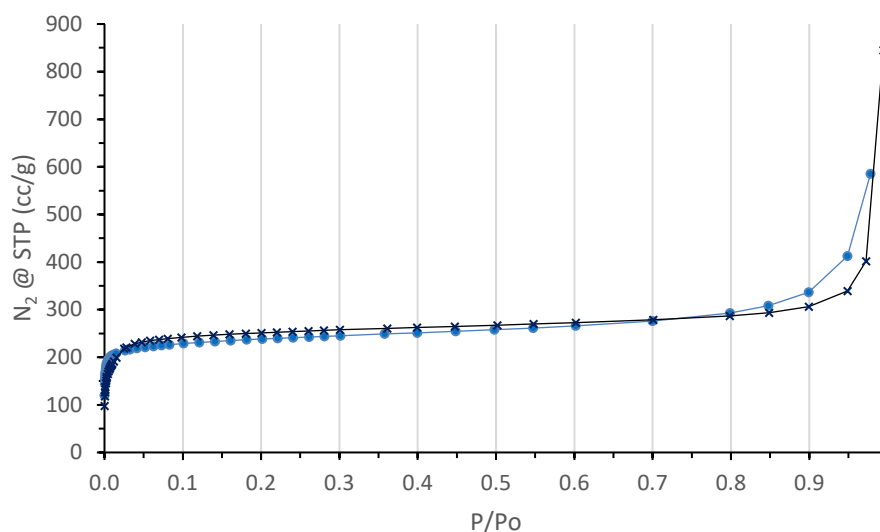

**Figure S 26** N<sub>2</sub> adsorption isotherms at 77 K of UiO-66-NH<sub>2</sub> (black), modified MOF (blue). A line on the adsorption leg of the isotherms are shown as a guide for the eye.

**Table S 17** BET Summary table for UiO-66-NH<sub>2</sub> film.

| Slope =                      |                     | 3.448                      |
|------------------------------|---------------------|----------------------------|
| Intercept =                  |                     | 8.64E-03                   |
| Correlation coefficient, r = |                     | 0.999868                   |
| C constant =                 |                     | 400.168                    |
| Surface Area =               |                     | 1007.567 m <sup>2</sup> /g |
| Relative Pressure (P/Po)     | Volume @ STP (cc/g) | 1 / [ W((Po/P) - 1) ]      |
| 0.012021                     | 191.4906            | 0.050841                   |
| 0.015032                     | 199.0806            | 0.061339                   |
| 0.025186                     | 217.957             | 0.094848                   |
| 0.027952                     | 221.0841            | 0.10407                    |
| 0.038613                     | 228.3483            | 0.14073                    |
| 0.047382                     | 231.7867            | 0.1717                     |
| 0.058198                     | 234.812             | 0.21056                    |

**Table S 18** BET Summary table for modified film.

| Slope =                      |                     | 3.776                     |
|------------------------------|---------------------|---------------------------|
| Intercept =                  |                     | 1.819e-03                 |
| Correlation coefficient, r = |                     | 0.999996                  |
| C constant =                 |                     | 2077.272                  |
| Surface Area =               |                     | 921.833 m <sup>2</sup> /g |
| Relative Pressure (P/Po)     | Volume @ STP (cc/g) | 1 / [ W((Po/P) - 1) ]     |
| 1.00239e-02                  | 204.1531            | 3.9683e-02                |
| 1.19932e-02                  | 205.6266            | 4.7233e-02                |
| 1.49484e-02                  | 208.0643            | 5.8356e-02                |
| 2.64011e-02                  | 214.0206            | 1.0138e-01                |
| 3.22315e-02                  | 216.0982            | 1.2331e-01                |
| 4.15376e-02                  | 218.7523            | 1.5851e-01                |

|             |          |            |
|-------------|----------|------------|
| 5.19271e-02 | 221.1534 | 1.9816e-01 |
|-------------|----------|------------|

**Table S 19** N<sub>2</sub> @ 77 K isotherm data for the UiO-66-NH<sub>2</sub> sample and the modified sample.

| UiO-66-NH <sub>2</sub> film |                     |  | Modified film     |                     |
|-----------------------------|---------------------|--|-------------------|---------------------|
| Relative Pressure           | Volume @ STP (cc/g) |  | Relative Pressure | Volume @ STP (cc/g) |
| 0.00009335                  | 120.2958            |  | 0.00009220        | 97.9796             |
| 0.00032144                  | 144.0888            |  | 0.00031980        | 117.879             |
| 0.00055476                  | 155.1988            |  | 0.00055432        | 126.8968            |
| 0.00077691                  | 161.8678            |  | 0.00077578        | 132.7546            |
| 0.00100291                  | 167.0056            |  | 0.00099888        | 137.3614            |
| 0.00151934                  | 175.1777            |  | 0.00151774        | 145.3587            |
| 0.00203410                  | 180.7724            |  | 0.00199892        | 150.8209            |
| 0.00253715                  | 184.8766            |  | 0.00249851        | 155.3847            |
| 0.00305505                  | 188.1089            |  | 0.00301261        | 159.2863            |
| 0.00406700                  | 192.6134            |  | 0.00400500        | 165.2973            |
| 0.00508567                  | 195.8038            |  | 0.00501720        | 170.2066            |
| 0.00607140                  | 198.1639            |  | 0.00601830        | 174.2387            |
| 0.00704017                  | 200.0212            |  | 0.00702886        | 177.8085            |
| 0.00800466                  | 201.5397            |  | 0.00803395        | 180.9981            |
| 0.00904286                  | 202.9778            |  | 0.00902179        | 183.8899            |
| 0.01002390                  | 204.1531            |  | 0.01001440        | 186.6054            |
| 0.01199320                  | 205.6266            |  | 0.01202130        | 191.4906            |
| 0.01494840                  | 208.0643            |  | 0.01503240        | 199.0806            |
| 0.02640110                  | 214.0206            |  | 0.02518620        | 217.957             |
| 0.03223150                  | 216.0982            |  | 0.02795210        | 221.0841            |
| 0.04153760                  | 218.7523            |  | 0.03861320        | 228.3483            |
| 0.05192710                  | 221.1534            |  | 0.04738180        | 231.7867            |
| 0.06240010                  | 223.1818            |  | 0.05819790        | 234.812             |
| 0.07283200                  | 224.9063            |  | 0.06952060        | 237.2529            |
| 0.08286620                  | 226.4542            |  | 0.08059920        | 239.2092            |
| 0.10086000                  | 228.8054            |  | 0.09804870        | 241.7622            |
| 0.12092800                  | 231.0975            |  | 0.11839000        | 244.2151            |
| 0.14117400                  | 233.1628            |  | 0.13913900        | 246.3336            |
| 0.16130600                  | 235.008             |  | 0.15949500        | 248.2008            |
| 0.18158700                  | 236.7369            |  | 0.18028000        | 249.8627            |
| 0.20163000                  | 238.3757            |  | 0.20038500        | 251.3702            |
| 0.22115500                  | 239.8191            |  | 0.21989200        | 252.744             |
| 0.24091300                  | 241.2728            |  | 0.24006100        | 254.0507            |
| 0.26108900                  | 242.6617            |  | 0.26024600        | 255.294             |
| 0.28105600                  | 244.0364            |  | 0.28014800        | 256.4917            |
| 0.30148600                  | 245.2764            |  | 0.30040400        | 257.5298            |
| 0.35761100                  | 248.9496            |  | 0.36093000        | 260.8267            |
| 0.39937600                  | 251.422             |  | 0.39886100        | 262.5633            |
| 0.44826900                  | 254.5316            |  | 0.44708000        | 264.8882            |
| 0.49807500                  | 257.9374            |  | 0.50153700        | 267.5964            |
| 0.54728500                  | 261.46              |  | 0.54769900        | 269.7217            |
| 0.60188000                  | 266.0398            |  | 0.60176700        | 272.5707            |
| 0.70005000                  | 275.8776            |  | 0.70060700        | 278.4198            |

|            |          |  |            |          |
|------------|----------|--|------------|----------|
| 0.79873600 | 292.5057 |  | 0.79843600 | 286.7765 |
| 0.84772400 | 308.3132 |  | 0.84844500 | 293.5561 |
| 0.89939800 | 336.5071 |  | 0.89944400 | 306.2291 |
| 0.94877700 | 412.8397 |  | 0.94877400 | 339.2968 |
| 0.97811600 | 585.0648 |  | 0.97229700 | 401.6661 |
| 0.97274700 | 576.6195 |  | 0.99462700 | 844.9511 |
| 0.94254500 | 445.7877 |  | 0.99213900 | 841.2557 |
| 0.90135700 | 363.4589 |  | 0.97306100 | 552.7968 |
| 0.84957700 | 322.6593 |  | 0.94367500 | 372.0458 |
| 0.74904800 | 287.5096 |  | 0.90244400 | 317.2631 |
| 0.65102600 | 272.3255 |  | 0.84928900 | 297.8562 |
| 0.55026500 | 262.8679 |  | 0.74792600 | 284.01   |
| 0.44884100 | 255.4269 |  | 0.65310800 | 276.8069 |
| 0.38800600 | 251.2457 |  | 0.55080000 | 270.9807 |
| 0.35044400 | 248.8855 |  | 0.45005100 | 265.9083 |
| 0.25280700 | 242.2504 |  | 0.38922200 | 262.8521 |
| 0.22865200 | 240.4782 |  | 0.35164800 | 260.9096 |
| 0.19911900 | 238.2495 |  | 0.24774100 | 254.825  |
| 0.17315600 | 236.1066 |  | 0.22882700 | 253.5929 |
| 0.16085300 | 235.0183 |  | 0.20066700 | 251.6301 |
| 0.14998400 | 234.0139 |  | 0.17475600 | 249.6536 |
| 0.12939600 | 231.9914 |  | 0.16133800 | 248.5433 |
| 0.11772300 | 230.7387 |  | 0.15050800 | 247.5905 |
| 0.09363090 | 227.9311 |  | 0.13120400 | 245.7548 |
| 0.07389220 | 225.1097 |  | 0.11890300 | 244.4489 |
| 0.05389300 | 221.5395 |  | 0.09611360 | 241.7198 |
| 0.02432170 | 212.9903 |  | 0.07675650 | 238.7838 |
| 0.01897040 | 210.2608 |  | 0.05215700 | 233.4786 |
| 0.01492300 | 207.6217 |  | 0.02483610 | 218.2349 |
| 0.01246630 | 205.5475 |  | 0.01903160 | 207.6645 |
| 0.00995108 | 204.021  |  | 0.01497690 | 197.8691 |
| 0.00798731 | 201.4716 |  | 0.01250590 | 191.5259 |
|            |          |  | 0.01001260 | 186.9088 |
|            |          |  | 0.00797998 | 181.0036 |
